# Supplementary material for: Formal [4 + 1] cycloaddition of o-quinone methides: facile synthesis of dihydrobenzofurans
Source: Royal Society of Chemistry journal article supplement (doi:10.1039/c4ra17003b), 2015-01-01

**Supporting Information for**

**Formal [4+1] Cycloaddition of o-Quinone Methides: Facile Synthesis  
of Dihydrobenzofurans**

Xiantao Lei,<sup>a,b</sup> Chun-Huan Jiang,<sup>a</sup> Xiaoan Wen,<sup>a</sup> Qing-Long Xu<sup>\*a</sup> and Hongbin Sun<sup>\*a</sup>

<sup>a</sup> *Jiangsu Key Laboratory of Drug Discovery for Metabolic Diseases and State Key Laboratory of Natural Medicines, Center of Drug Discovery, China Pharmaceutical University, 24 Tongjia Xiang, Nanjing 210009, China*

<sup>b</sup> *State Key Laboratory of Drug Research, Shanghai Institute of Materia Medica, Chinese Academy of Science, 555 Zuchongzhi Road, Shanghai 201203, China*

**Table of Contents**

|                                                                                     |    |
|-------------------------------------------------------------------------------------|----|
| General Information.....                                                            | S2 |
| Synthesis of (2-(bromomethyl)phenoxy)(tert-butyl)dimethylsilane ( <b>1a</b> ).....  | S2 |
| Synthesis of (2-(bromomethyl)phenoxy)(tert-butyl)dimethylsilane ( <b>1a'</b> )..... | S3 |
| General Procedure for Synthesis Chiral 2,3-Dihydrobenzofuran.....                   | S4 |
| General Procedure for Synthesis of <b>5</b> .....                                   | S5 |
| References.....                                                                     | S6 |
| Copies of NMR spectra and HPLC analysis.....                                        | S7 |

## General Information

$^1\text{H}$  and  $^{13}\text{C}$  NMR spectra were recorded on an ACF\* 300Q Bruker or ACF\* 500Q Bruker spectrometer. Low- and high-resolution mass spectra (LRMS and HRMS) were recorded in electron impact mode. The mass analyzer type used for the HRMS measurements was TOF. Reactions were monitored by TLC on silica gel 60 F254 plates (Qingdao Ocean Chemical Company, China). Column chromatography was carried out on silica gel (200-300 mesh, Qingdao Ocean Chemical Company, China). Data for  $^1\text{H}$  NMR are recorded as follows: chemical shift ( $\delta$ , ppm), multiplicity (s = singlet, d = doublet, t = triplet, m = multiplet or unresolved, br s = broad singlet, coupling constant(s) in Hz, integration). Data for  $^{13}\text{C}$  NMR are reported in terms of chemical shift ( $\delta$ , ppm).

### Synthesis of (2-(bromomethyl)phenoxy)(tert-butyl)dimethylsilane (**1a**)<sup>[1]</sup>

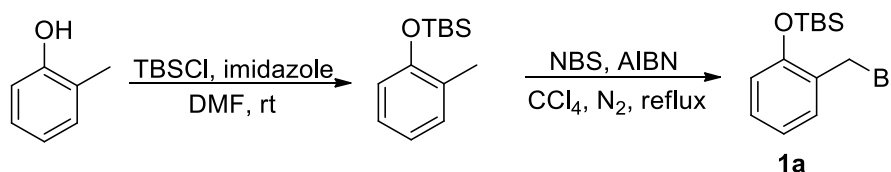

To a solution of *o*-cresol (541 mg, 5 mmol) in DMF (5 mL) was added *tert*-butyldimethylsilanechloride (TMSCl) (829 mg, 5.5 mmol) followed by imidazole (749 mg, 11 mmol). Then the reaction mixture was stirred at room temperature overnight. The reaction was partitioned in water (5 mL) and EtOAc (15 mL). The organic layer was separated, washed with water (5 mL), dried over anhydrous  $\text{Na}_2\text{SO}_4$ , filtrated and concentrated under reduced pressure. The residue was purified by flash chromatography on silica gel (petroleum ether) to yield colorless oil (505 mg, 45% yield).

The silylated phenol (505 mg, 2.27 mmol) was solved in  $\text{CCl}_4$  (10 mL), and N-bromosuccinimide (NBS) (404 mg, 2.27 mmol) and AIBN (56 mg, 0.34 mmol) were added in one portion. The solution was purged with  $\text{N}_2$  and refluxed overnight. The reaction was allowed to cool to room temperature and filtered through a pad of  $\text{SiO}_2$ , furnished by hexane. The filtrate was concentrated under reduced pressure and

purified by flash chromatography on silica gel (hexane), giving colorless oil **1a** (343 mg, 50% yield).  $^1\text{H}$  NMR (300 MHz,  $\text{CDCl}_3$ )  $\delta$  7.34 (dd,  $J = 1.6, 7.5$  Hz, 1H), 7.19 (dt,  $J = 1.7, 8.0$  Hz, 1H), 6.92 (dt,  $J = 0.9, 7.5$  Hz, 1H), 6.81 (d,  $J = 8.1$  Hz, 1H), 4.53 (s, 2H), 1.06 (s, 9H), 0.29 (s, 6H).

**Synthesis of (2-(bromomethyl)phenoxy)(tert-butyl)dimethylsilane (**1a'**)**<sup>[1]</sup>

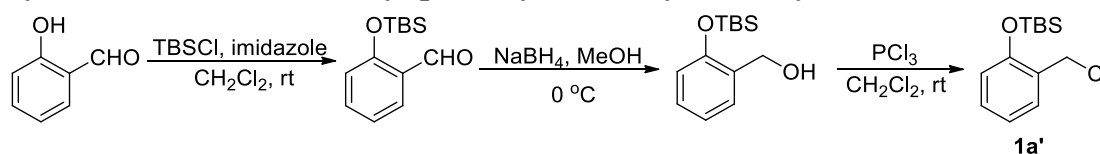

To a solution of 2-hydroxybenzaldehyde (1.22 g, 10 mmol) and imidazole (1.36 g, 20 mmol) in  $\text{CH}_2\text{Cl}_2$  (20 mL), a solution of TBSCl (3.01 g, 20 mmol) in  $\text{CH}_2\text{Cl}_2$  (10 mL) was added dropwise. After the addition, the reaction mixture was stirred at room temperature overnight. The reaction was partitioned in water (15 mL) and EtOAc (50 mL). The organic layer was separated, washed with water (5 mL), dried over anhydrous  $\text{Na}_2\text{SO}_4$ , filtrated and concentrated under reduced pressure. The crude oil was used without purification.

The crude oil was solved in MeOH (20 mL).  $\text{NaBH}_4$  (378 mg, 10 mmol) was added in portions carefully at  $0\text{ }^\circ\text{C}$ . After the reaction mixture was stirred at  $0\text{ }^\circ\text{C}$  for 4 h, MeOH was evaporated in vacuo. A combined solution of saturated  $\text{NH}_4\text{Cl}$  (15 mL) and EtOAc (15 mL) was added, two phases were separated, and the aqueous layer was extracted with EtOAc ( $3 \times 20$  mL). The combined organic layers were washed with brine, dried over anhydrous  $\text{Na}_2\text{SO}_4$  and concentrated in vacuo to give yellow oil. The crude oil was used without purification.

To an ice cooled solution the crude oil in dry  $\text{CH}_2\text{Cl}_2$  (30 mL),  $\text{PCl}_3$  (960  $\mu\text{L}$ , 11 mmol) was added dropwise. After the addition, the solution was stirred at  $0\text{ }^\circ\text{C}$  for 4 h and was partitioned in brine (10 mL) and  $\text{CH}_2\text{Cl}_2$  (30 mL). The organic layer was separated, dried over  $\text{Na}_2\text{SO}_4$ , filtrated and concentrated under reduce pressure. The residue was purified by flash chromatography on silica gel (petroleum ether) and yielded colorless oil **1a'** (464 mg, 18% yield over three steps).  $^1\text{H}$  NMR (300 MHz,

CDCl<sub>3</sub>)  $\delta$  7.36 (dd,  $J$  = 7.5, 1.4 Hz, 1H), 7.24-7.17 (m, 1H), 6.94 (t,  $J$  = 7.5 Hz, 1H), 6.83 (d,  $J$  = 8.1 Hz, 1H), 4.63 (s, 2H), 1.05 (s, 9H), 0.28 (s, 6H).

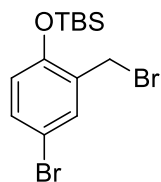

**(4-bromo-2-(bromomethyl)phenoxy)(tert-butyl)dimethylsilane**

**1b**, colorless oil, 1.09 g, 49% yield over three steps. Prepared according to the procedure of **1a'** using 5-bromo-2-hydroxybenzaldehyde and PBr<sub>3</sub>. <sup>1</sup>H NMR (300 MHz, CDCl<sub>3</sub>)  $\delta$  7.48 (d,  $J$  = 2.1 Hz, 1H), 7.30 (dd,  $J$  = 8.7, 2.2 Hz, 1H), 6.72 (d,  $J$  = 8.7 Hz, 1H), 4.47 (s, 2H), 1.08 (s, 9H), 0.32 (s, 6H). <sup>13</sup>C NMR (75 MHz, CDCl<sub>3</sub>)  $\delta$  153.0, 133.7, 132.6, 130.6, 120.2, 113.1, 27.8, 25.8, 18.3, -4.1.

**General Procedure for Synthesis Chiral 2,3-Dihydrobenzofuran.**

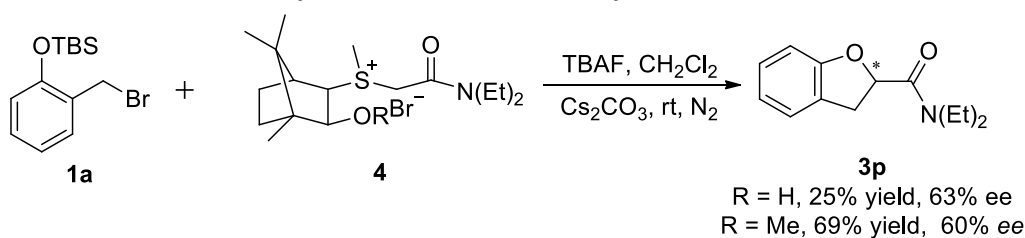

A mixture of O-silylated phenol **1a** (84.0 mg, 0.28 mmol), chiral camphor sulfonium salt (**4a**, R = H, 0.42 mmol or **4b**, R = Me, 0.42 mmol) and Cs<sub>2</sub>CO<sub>3</sub> (136 mg, 0.42 mmol) in dry CH<sub>2</sub>Cl<sub>2</sub> (5 mL) was stirred at room temperature under N<sub>2</sub>. Then TBAF (1.0 M in THF, 1.25 mL) was added dropwise. After the addition, the mixture was stirred at room temperature for 24 h. The reaction was concentrated under reduced pressure and purified by flash chromatography on silica gel (petroleum ether : ethyl acetate = 10:1-5:1 ) to afford **3p**. The absolute configuration of **3p** is not assigned.

R = H, 25% yield, 63% ee. [Daicel CHIRALPAK IC (0.46 cm x 25 cm); *n*-hexanes/*i*-propanol = 90/10; flow rate = 1.0 mL/min; detection wavelength = 230 nm;  $t_R$  = 28.05 (minor),  $t_R$  = 33.42 (major) min.]

R = Me, 69% yield, 60% ee,  $[\alpha]_D^{25}$  = -31.8 ( $c$  = 0.33, CH<sub>3</sub>OH). [Daicel CHIRALPAK IC (0.46 cm x 25 cm); *n*-hexanes/*i*-propanol = 90/10; flow rate = 1.0 mL/min; detection wavelength = 230 nm;  $t_R$  = 27.36 (minor),  $t_R$  = 32.54 (major) min.]

### General Procedure for Synthesis of **5**.

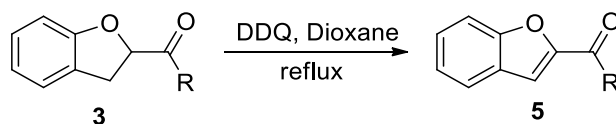

DDQ (4.0 equiv.) was added to a solution of **3** in dry dioxane. Then the reaction mixture was stirred at reflux for 24 h. Filtration and concentration in vacuo gave crude product, which was purified by flash chromatography on silica gel using petroleum ether and ethyl acetate to give the product **5**.

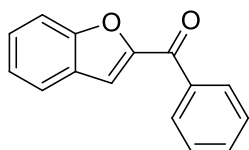

**5a**,<sup>[2]</sup> yellow solid, 81% yield, m.p. 83-85 °C. <sup>1</sup>H NMR (300 MHz, CDCl<sub>3</sub>) δ 8.05 (d, *J* = 8.0 Hz, 2H), 7.73 (d, *J* = 7.9 Hz, 1H), 7.63 (dd, *J* = 10.1, 4.4 Hz, 2H), 7.58-7.47 (m, 4H), 7.32 (dd, *J* = 16.4, 9.1 Hz, 1H).

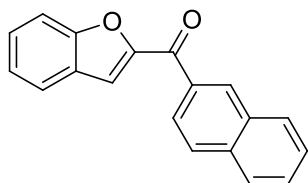

**5k**, white solid, 83% yield, m.p. 96-97.5 °C. <sup>1</sup>H NMR (300 MHz, CDCl<sub>3</sub>) δ 8.62 (s, 1H), 8.10 (d, *J* = 8.5 Hz, 1H), 8.00 (t, *J* = 8.7 Hz, 2H), 7.93 (d, *J* = 7.9 Hz, 1H), 7.76 (d, *J* = 7.8 Hz, 1H), 7.68 (d, *J* = 8.5 Hz, 1H), 7.61 (q, *J* = 8.7 Hz, 3H), 7.53 (t, *J* = 7.6 Hz, 1H), 7.36 (t, *J* = 7.5 Hz, 1H).

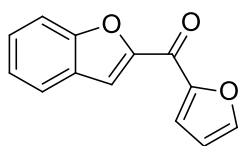

**5l**,<sup>[3]</sup> yellow solid, 56% yield, m.p. 66-67 °C. <sup>1</sup>H NMR (300 MHz, CDCl<sub>3</sub>) δ 7.91 (s, 1H), 7.77 (d, *J* = 7.1 Hz, 2H), 7.71 (d, *J* = 3.4 Hz, 1H), 7.65 (d, *J* = 8.4 Hz, 1H), 7.51 (t, *J* = 7.8 Hz, 1H), 7.35 (t, *J* = 7.5 Hz, 1H), 6.72-6.63 (m, 1H).

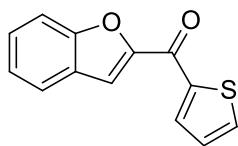

**5m**,<sup>[4]</sup> white solid, 81% yield, m.p. 59-61 °C. <sup>1</sup>H NMR (300 MHz, CDCl<sub>3</sub>) δ 8.32 (d, *J*

= 3.9 Hz, 1H), 7.77-7.71 (m, 3H), 7.64 (d,  $J = 8.4$  Hz, 1H), 7.50 (t,  $J = 8.4$  Hz, 1H), 7.34 (t,  $J = 8.1$  Hz, 1H), 7.25 (d,  $J = 9.0$  Hz, 1H).

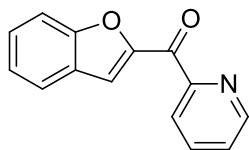

**5n**,<sup>[5]</sup> white solid, 53% yield, m.p. 79-80.5 °C. <sup>1</sup>H NMR (300 MHz, CDCl<sub>3</sub>)  $\delta$  8.79 (d,  $J = 4.6$  Hz, 1H), 8.48 (s, 1H), 8.24 (d,  $J = 7.9$  Hz, 1H), 7.93 (t,  $J = 7.5$  Hz, 1H), 7.78 (d,  $J = 7.8$  Hz, 1H), 7.66 (d,  $J = 8.6$  Hz, 1H), 7.52 (dd,  $J = 16.6, 8.7$  Hz, 2H), 7.37-7.29 (m, 2H).

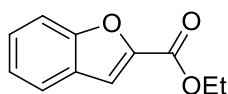

**5o**,<sup>[6]</sup> colorless oil, 75% yield. <sup>1</sup>H NMR (300 MHz, CDCl<sub>3</sub>)  $\delta$  7.67 (d,  $J = 7.8$  Hz, 1H), 7.58 (d,  $J = 8.4$  Hz, 1H), 7.52 (s, 1H), 7.43 (t,  $J = 7.2$  Hz, 1H), 7.29 (t,  $J = 7.2$  Hz, 1H), 4.43 (q,  $J = 7.2$  Hz, 2H), 1.42 (t,  $J = 7.2$  Hz, 3H).

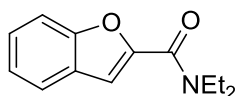

**5p**,<sup>[7]</sup> yellow oil, 69% yield. <sup>1</sup>H NMR (300 MHz, CDCl<sub>3</sub>)  $\delta$  7.66 (d,  $J = 7.7$  Hz, 1H), 7.53 (d,  $J = 8.2$  Hz, 1H), 7.40 (t,  $J = 7.5$  Hz, 1H), 7.33-7.25 (m, 2H), 3.62 (m, 4H), 1.32 (m, 6H).

## References:

- [1] Izquierdo, J.; Orue, A.; Scheidt, K. A. *J. Am. Chem. Soc.* **2013**, *135*, 10634.
- [2] Carr r, A.; Brinet, D.; Florent, J. C.; Rousselle, P.; Bertounesque, E. *J. Org. Chem.* **2012**, *77*, 1316.
- [3] Magdesieva, N. N.; Chovnikova, N. G. *Zh. Org. Khim.* **1979**, *15*, 2402.
- [4] Rott, G. M.; Shevchenko, L. I.; Amoryzanova, O. A.; Savina, E. P.; Deeva, V. S.; Skvortsov, V. G.; Trofimov, F. A. *Khimiko-Farmatsevticheskii Zhurnal* **1998**, *32*, 28.
- [5] Binon, F.; Inion, H. *Chim. Ther.* **1967**, *2*, 113.
- [6] Song, W.-J.; Yang, X.-D.; Zeng, X.-H.; Xu, X.-L.; Zhang, G.-L.; Zhang, H.-B. *RSC Advances* **2012**, *2*, 4612.
- [7] Papa, D.; Schwenk, E.; Villani, F.; Klingsberg, E. *J. Am. Chem. Soc.* **1950**, *72*, 3885.

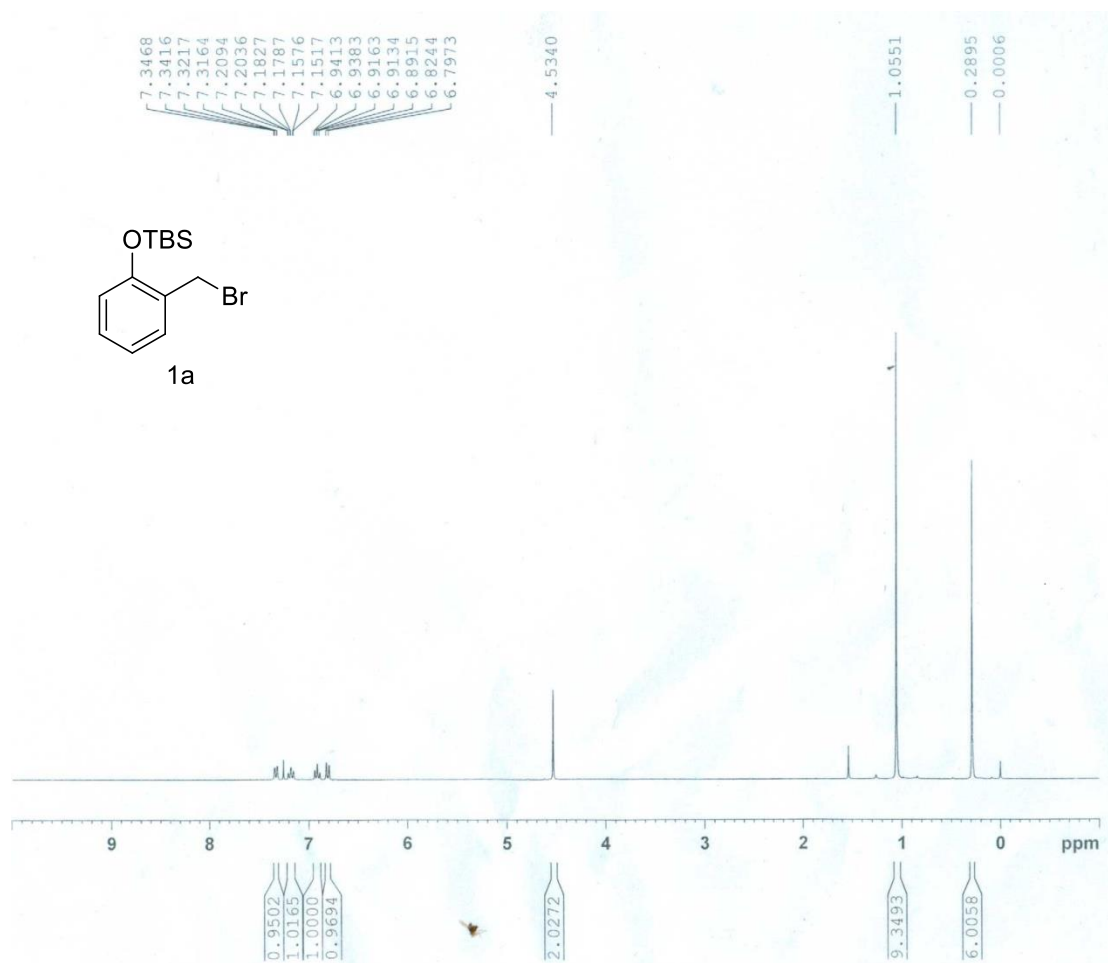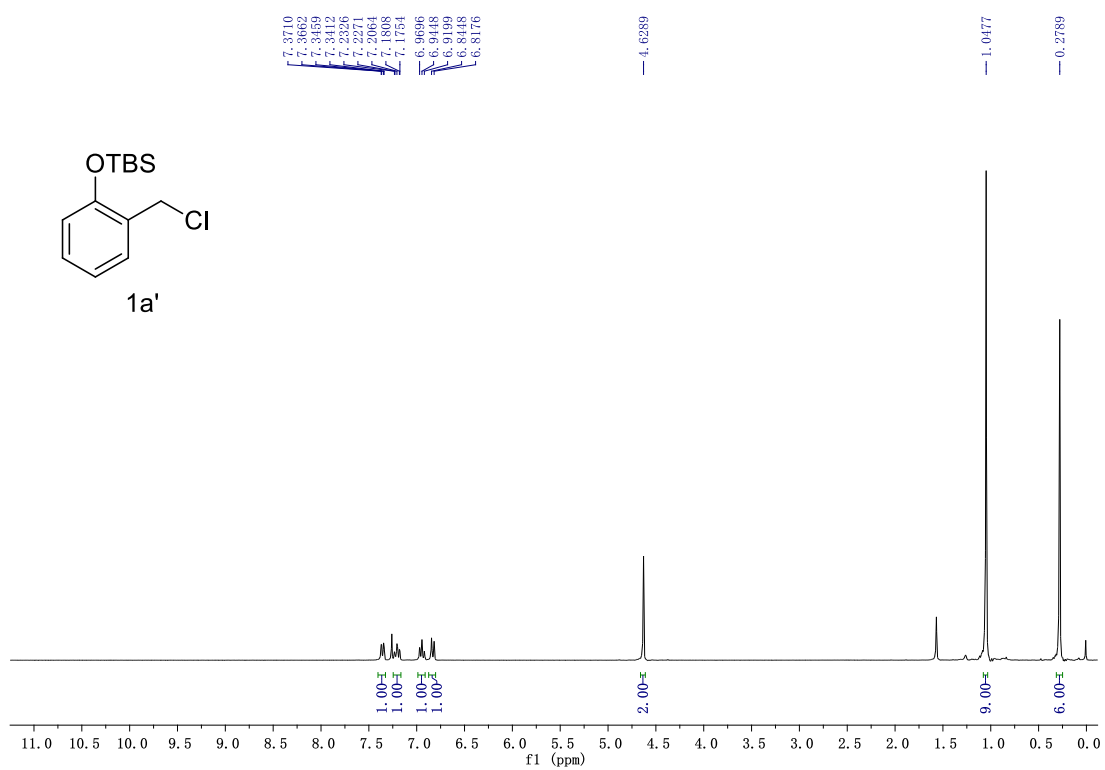

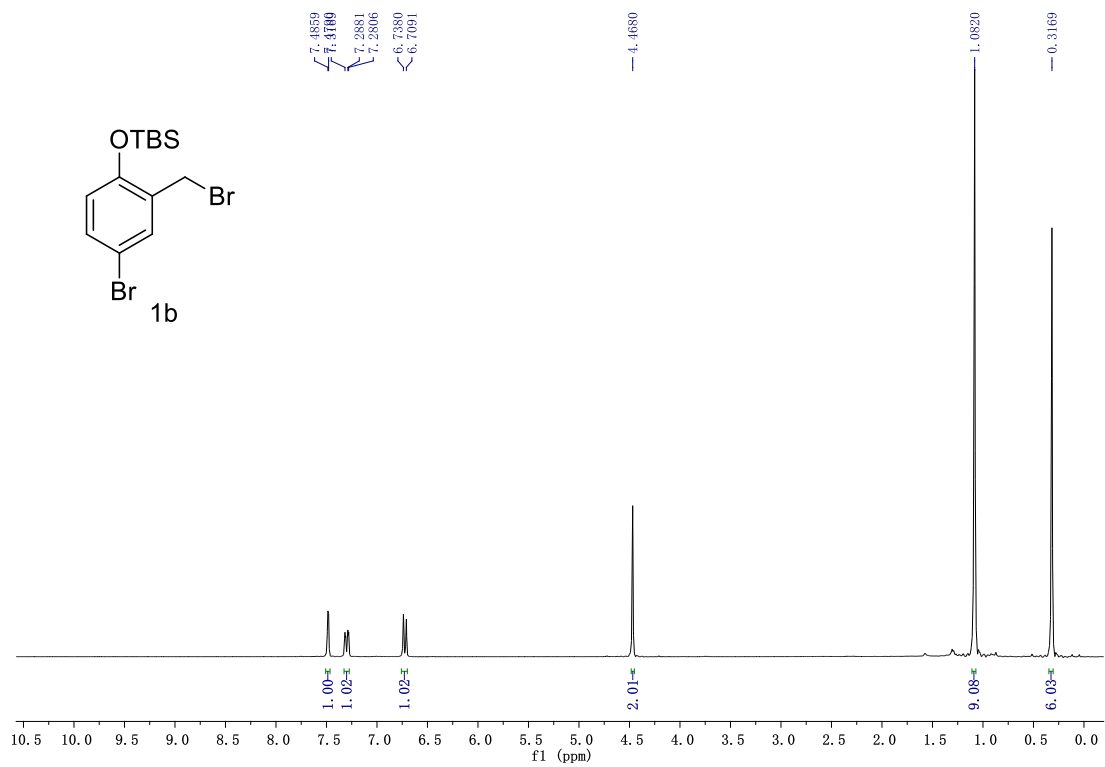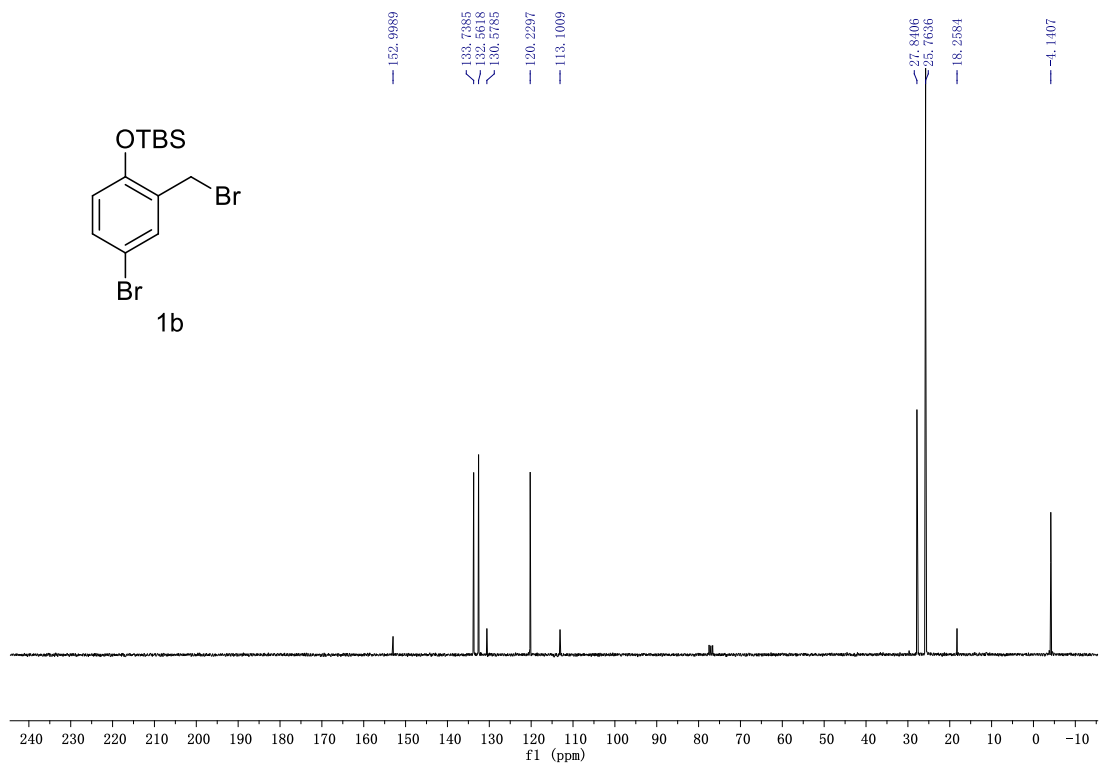



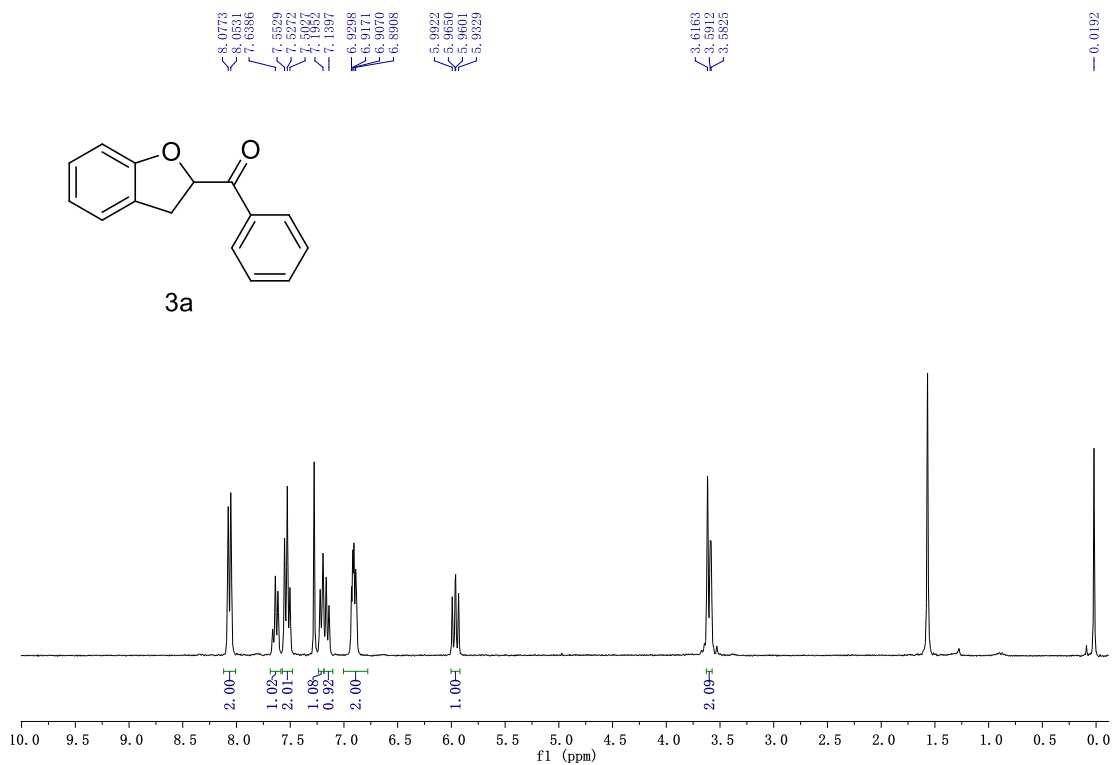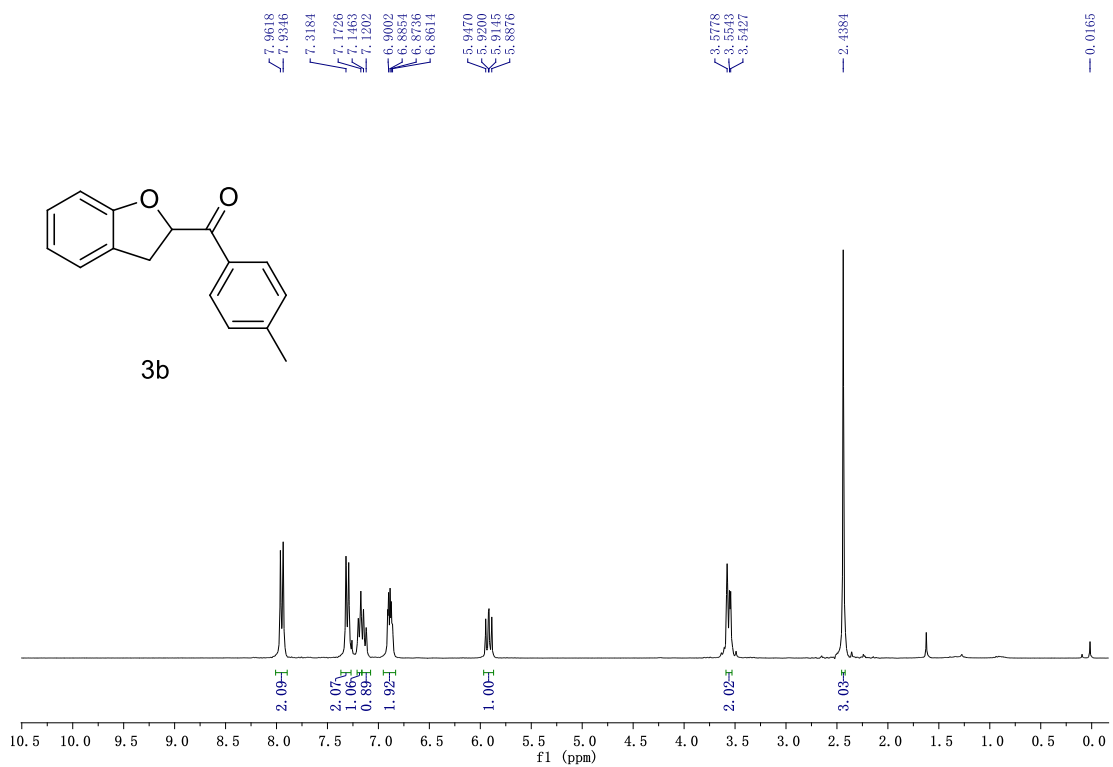

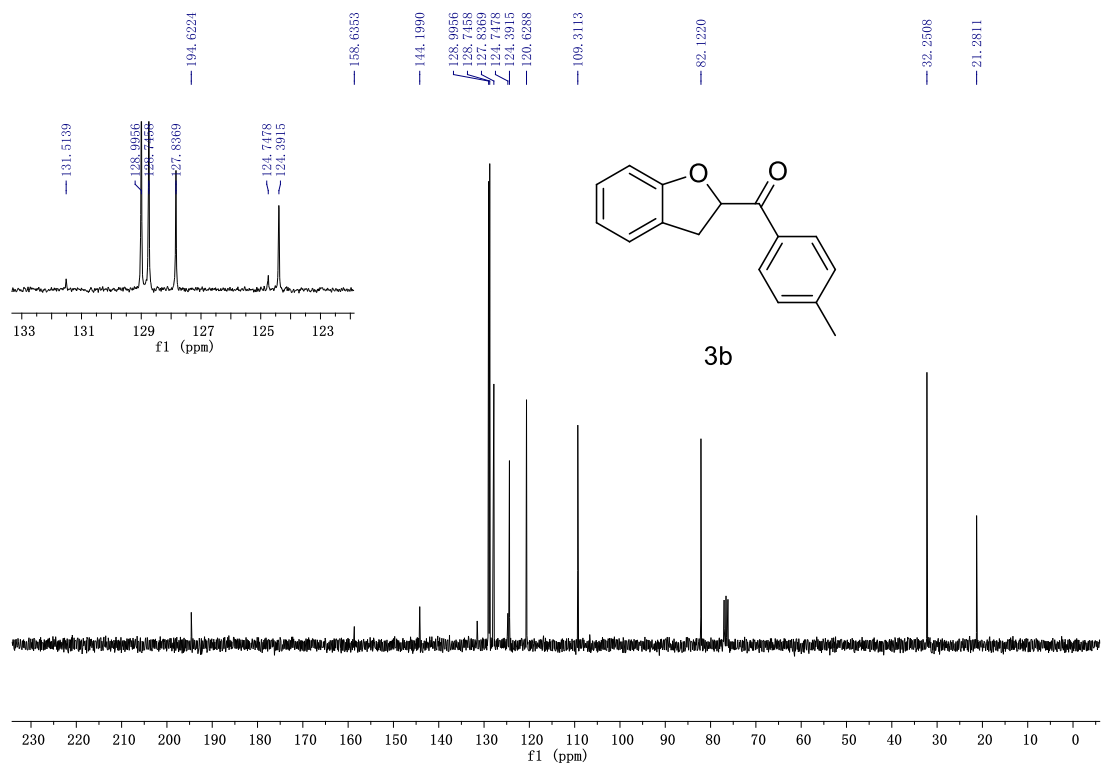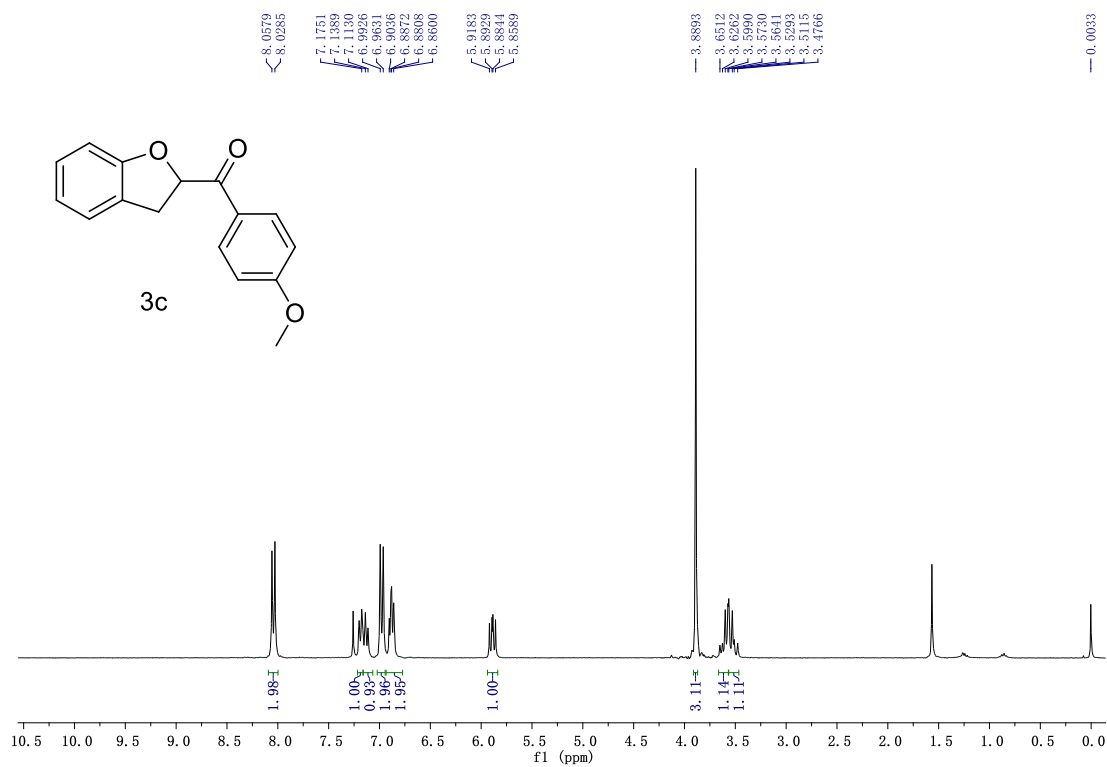

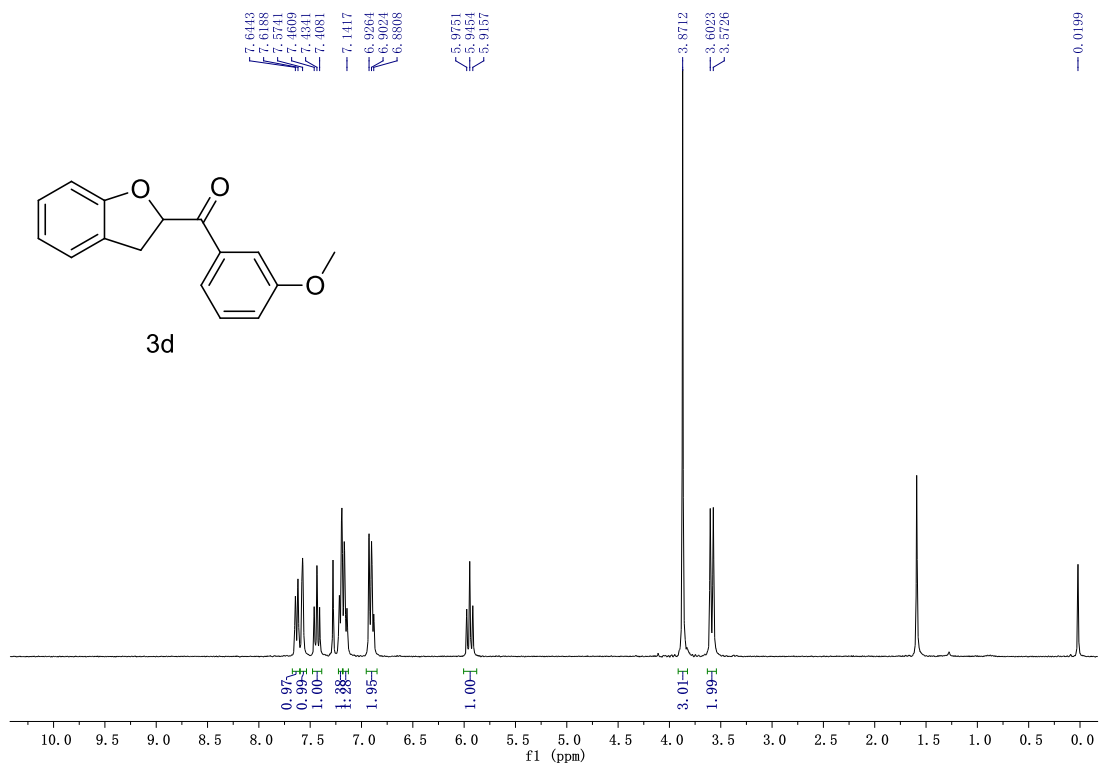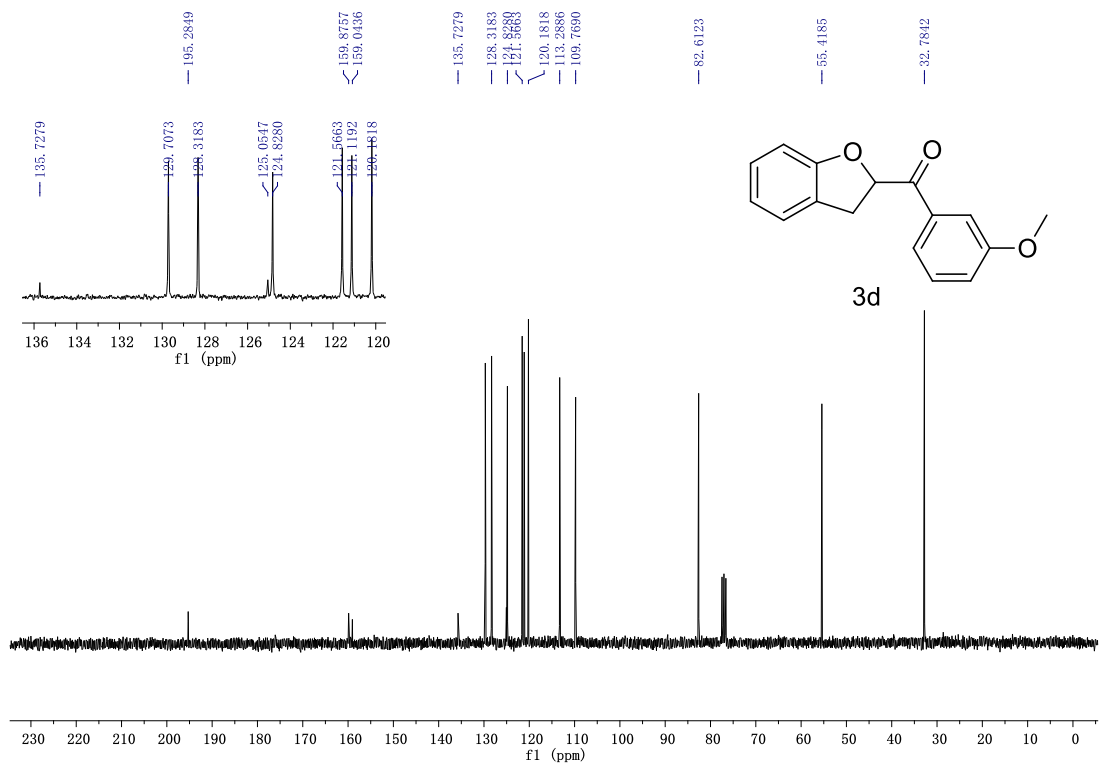

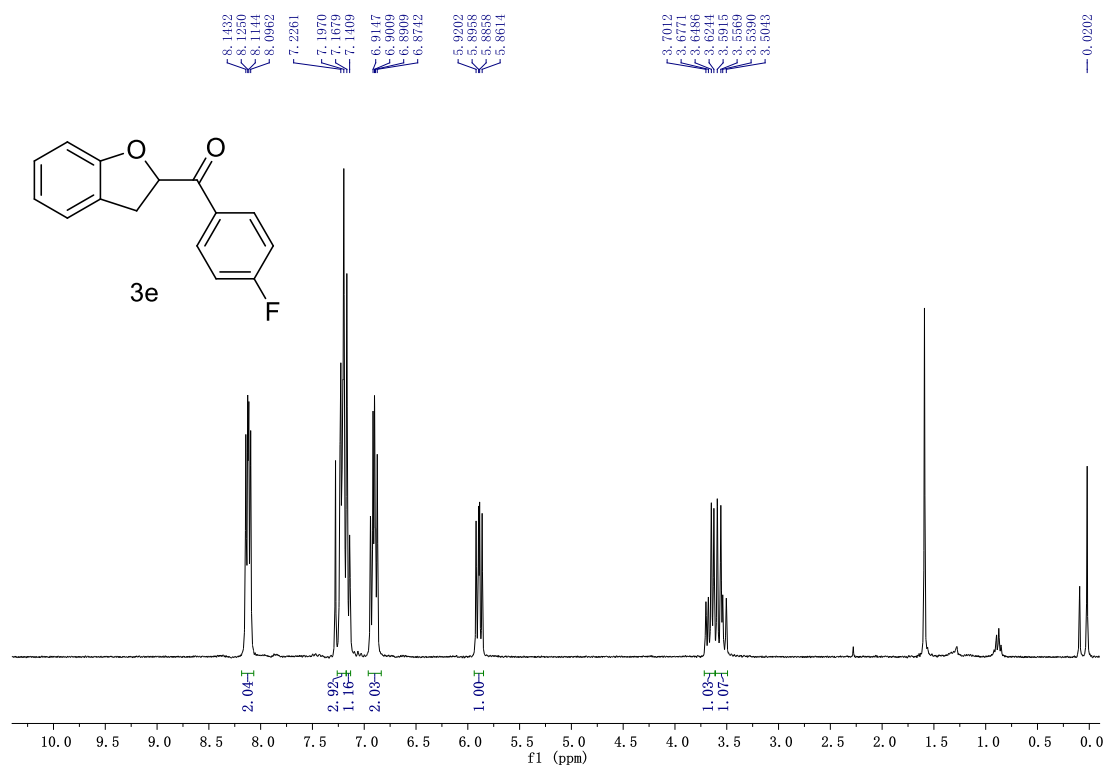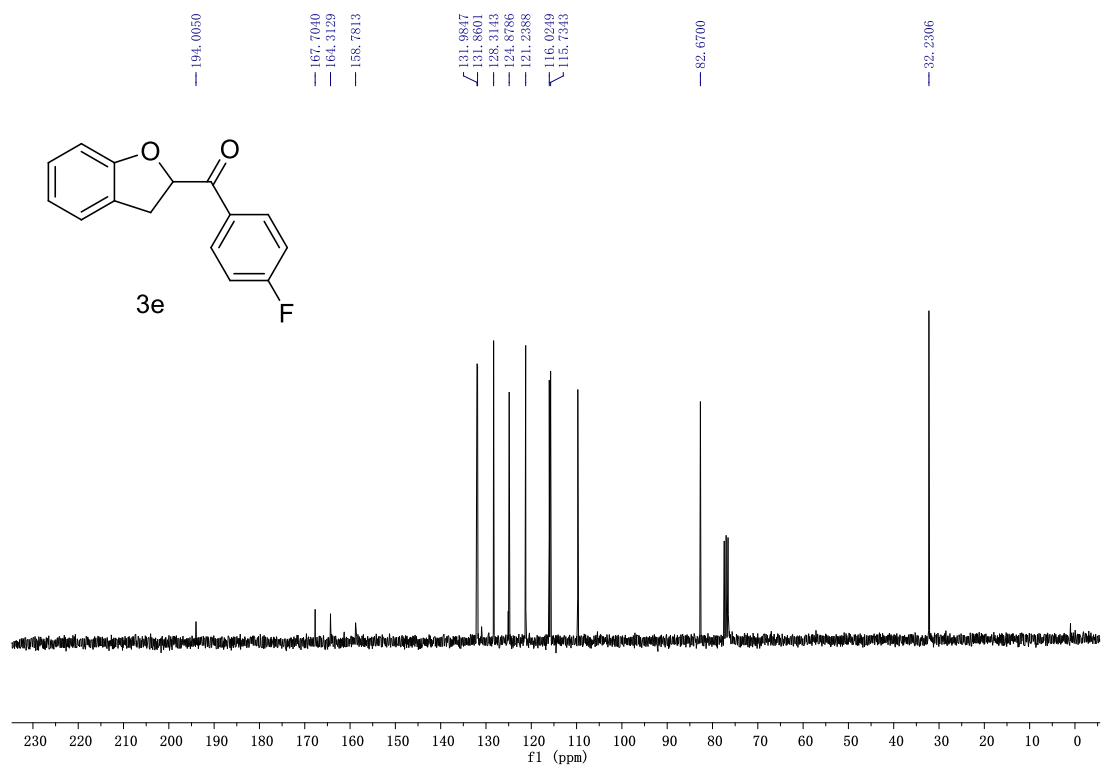

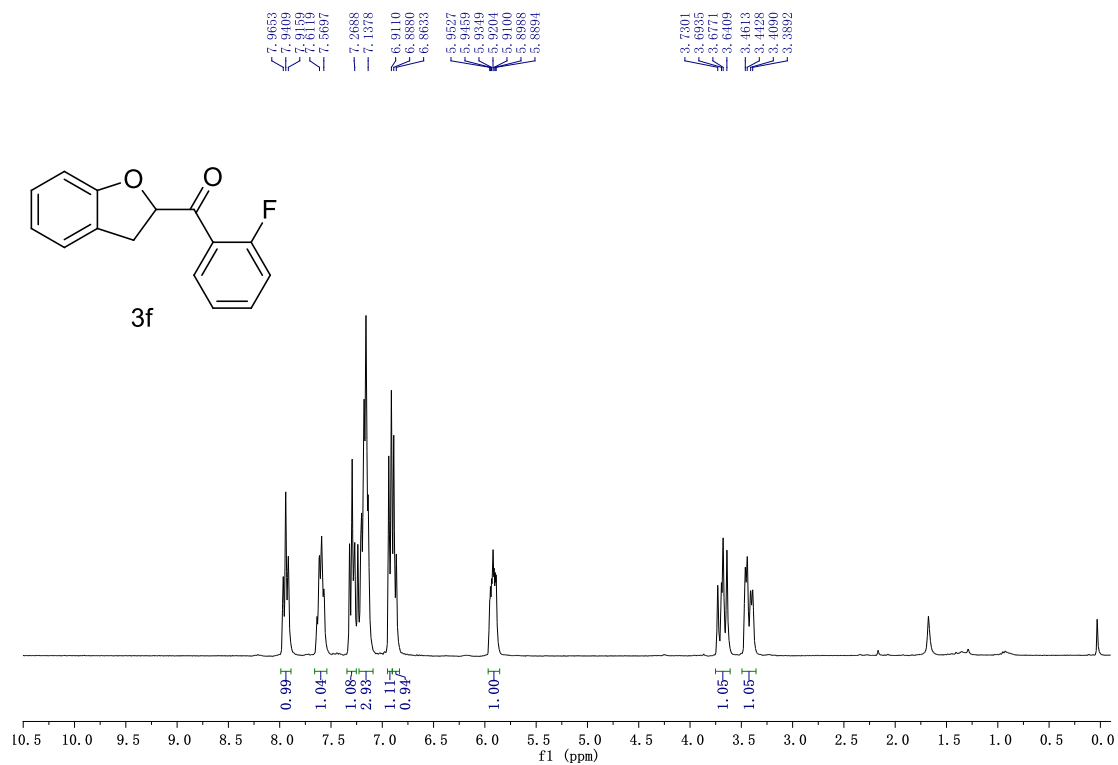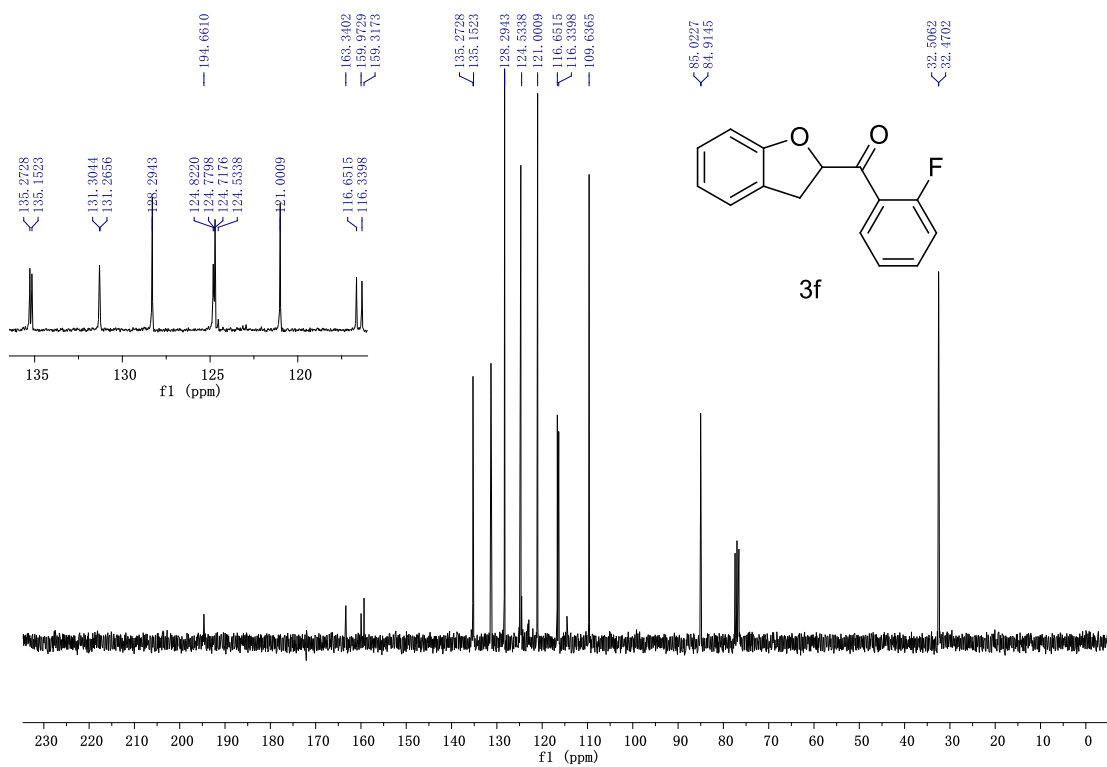

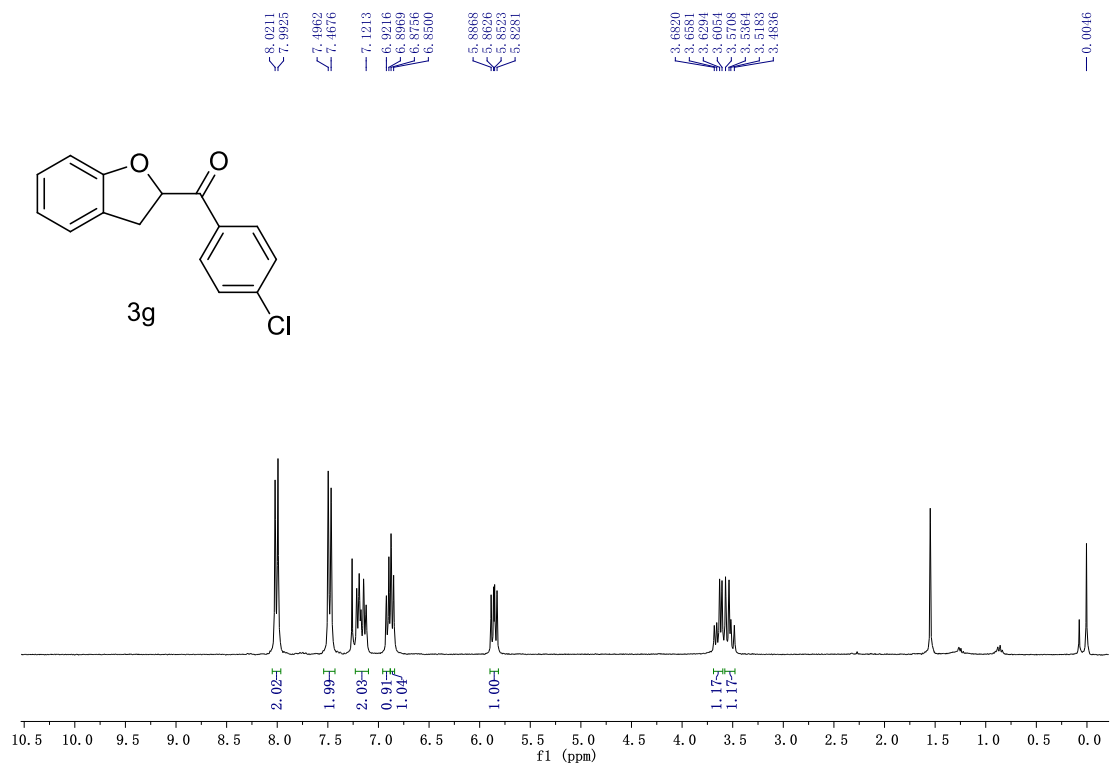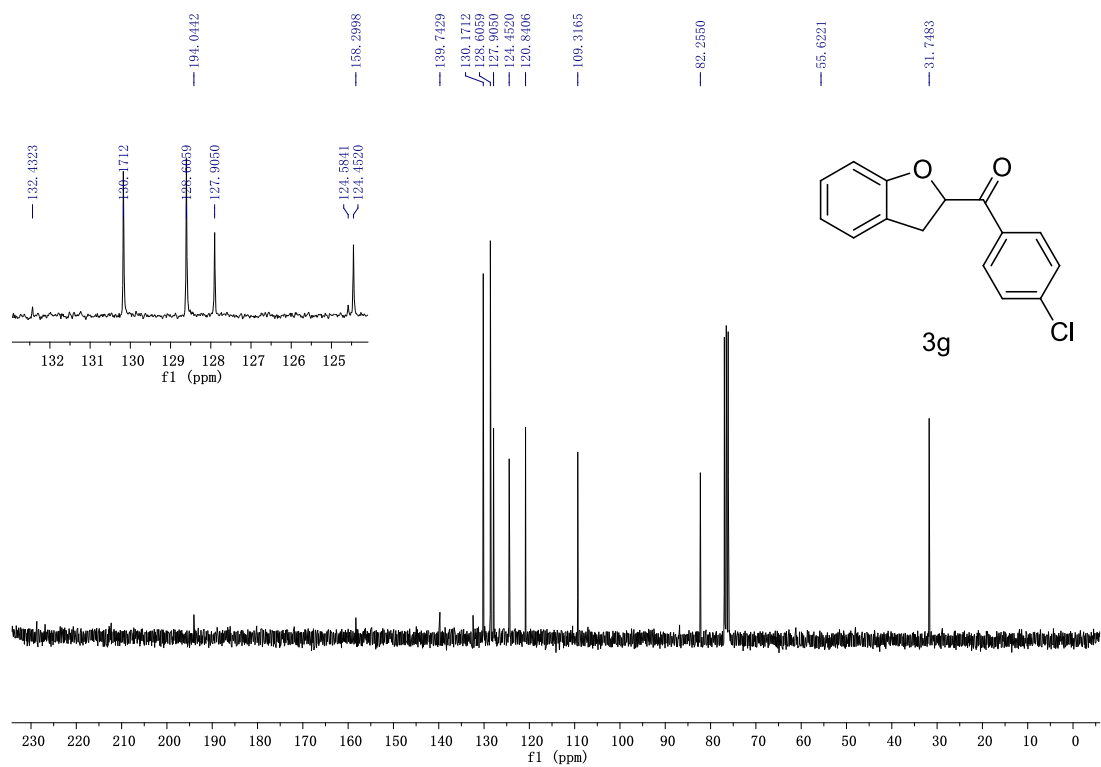

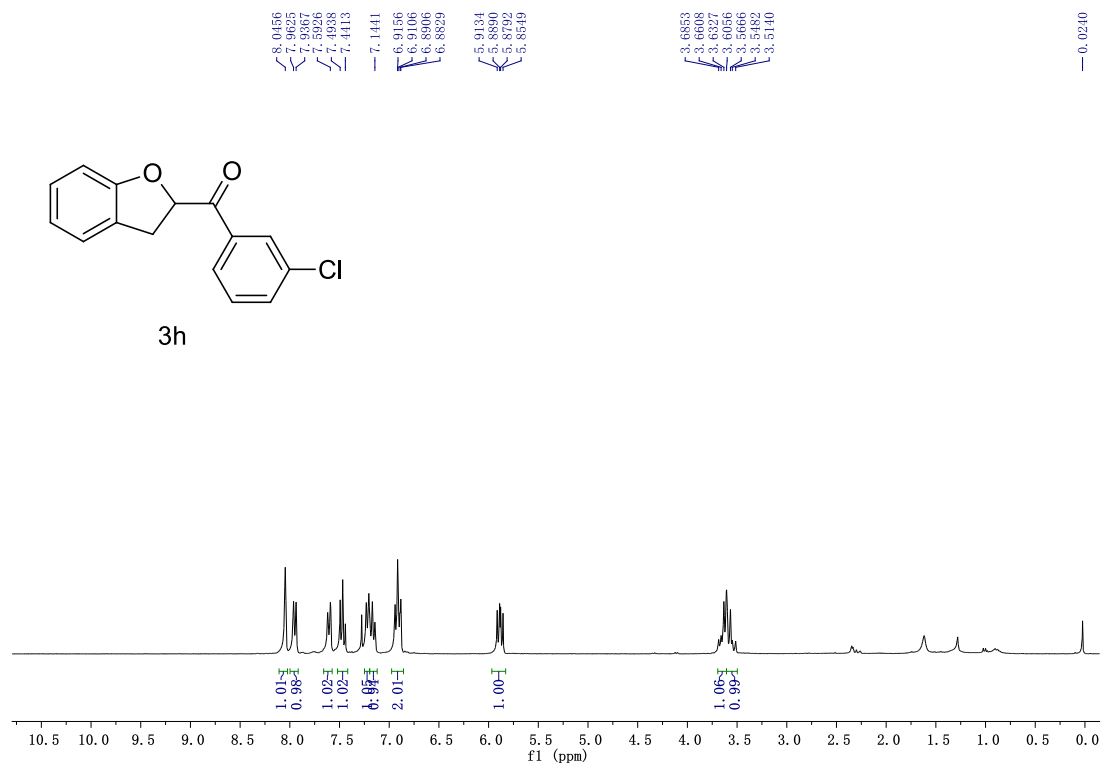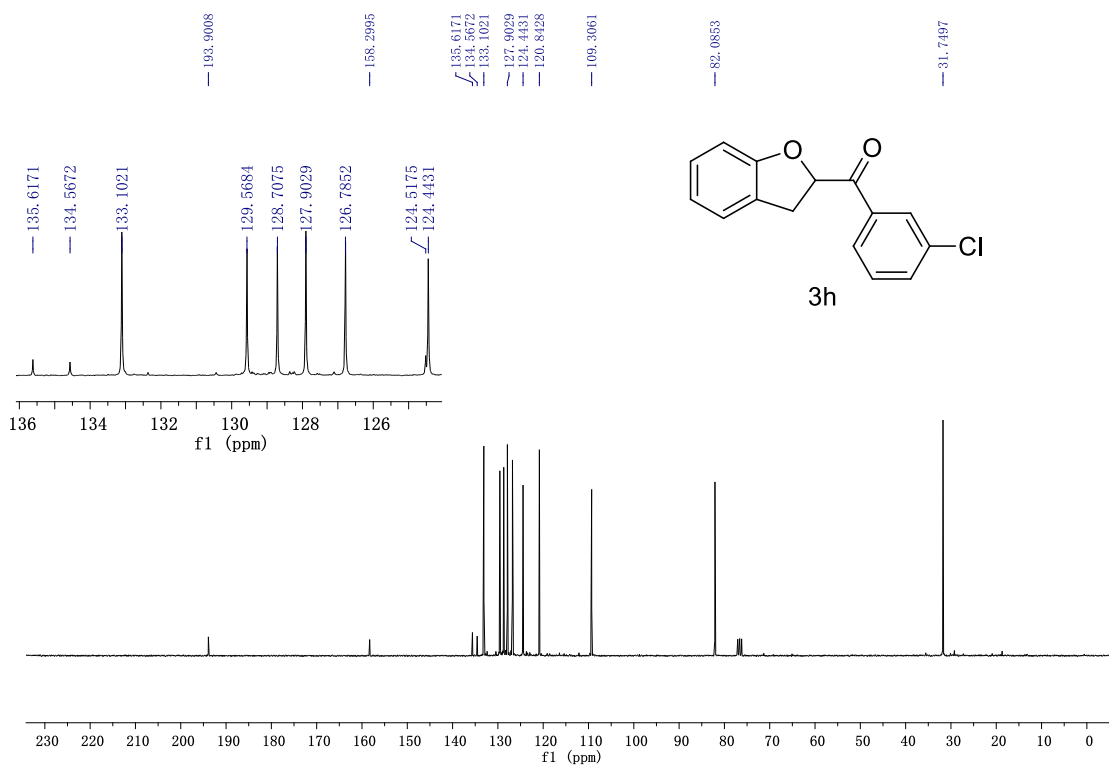

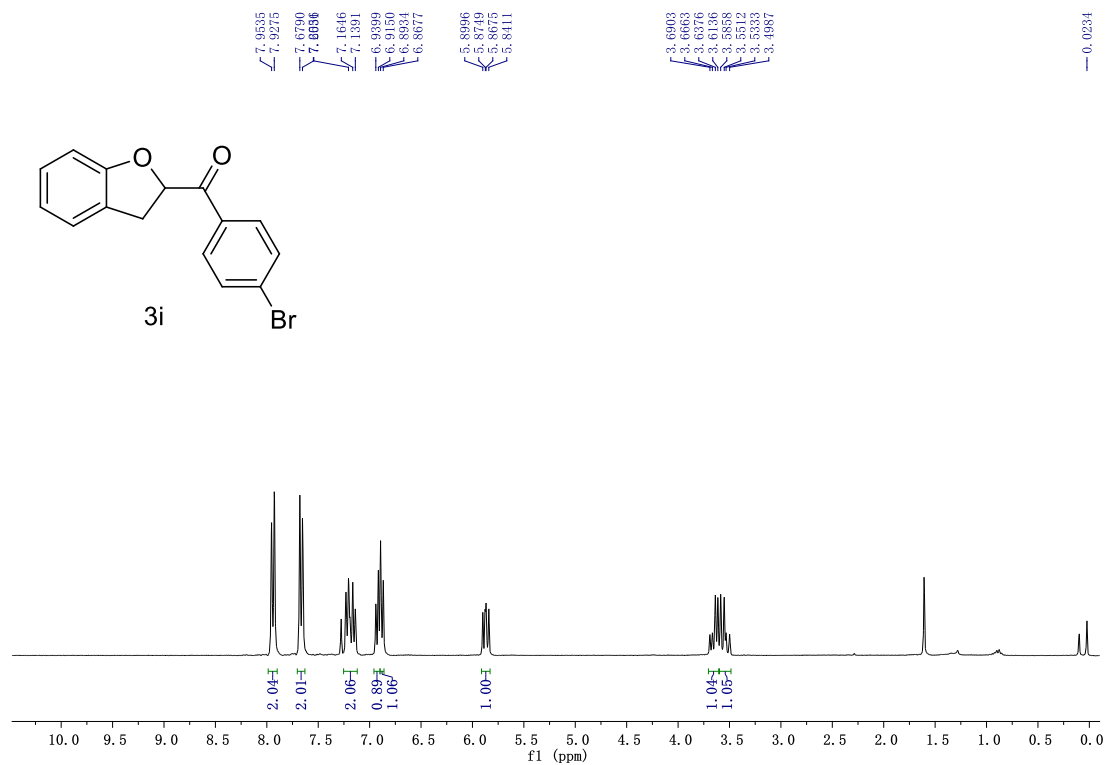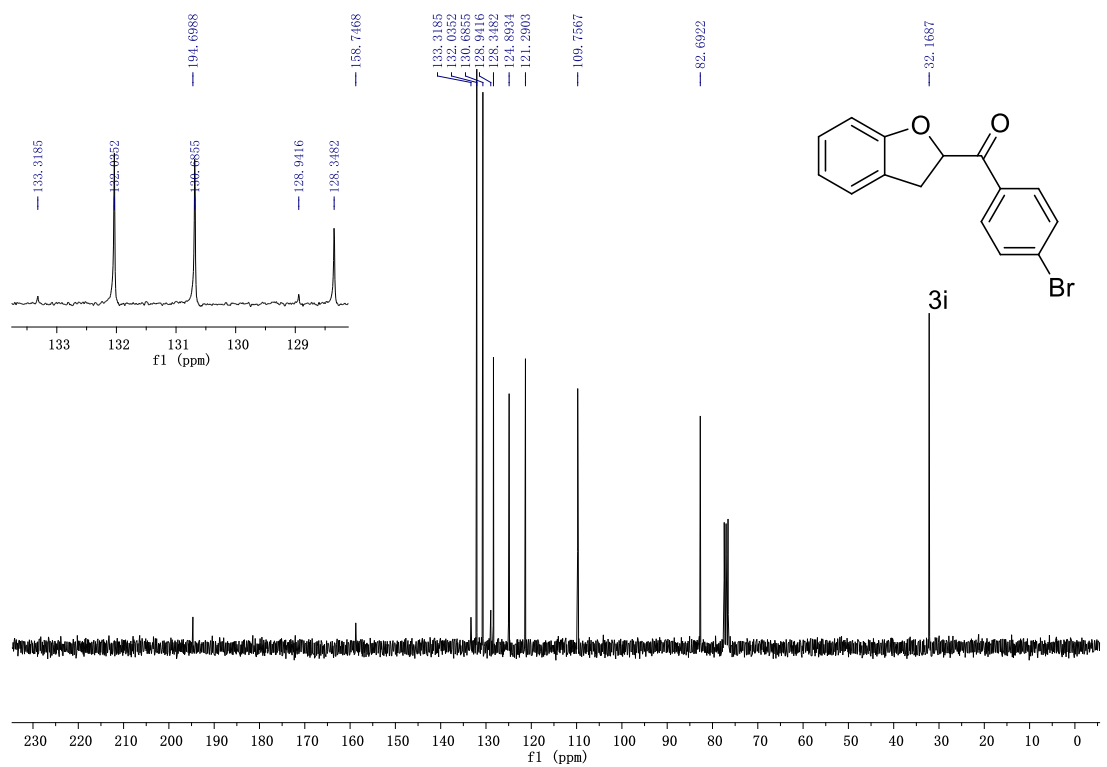



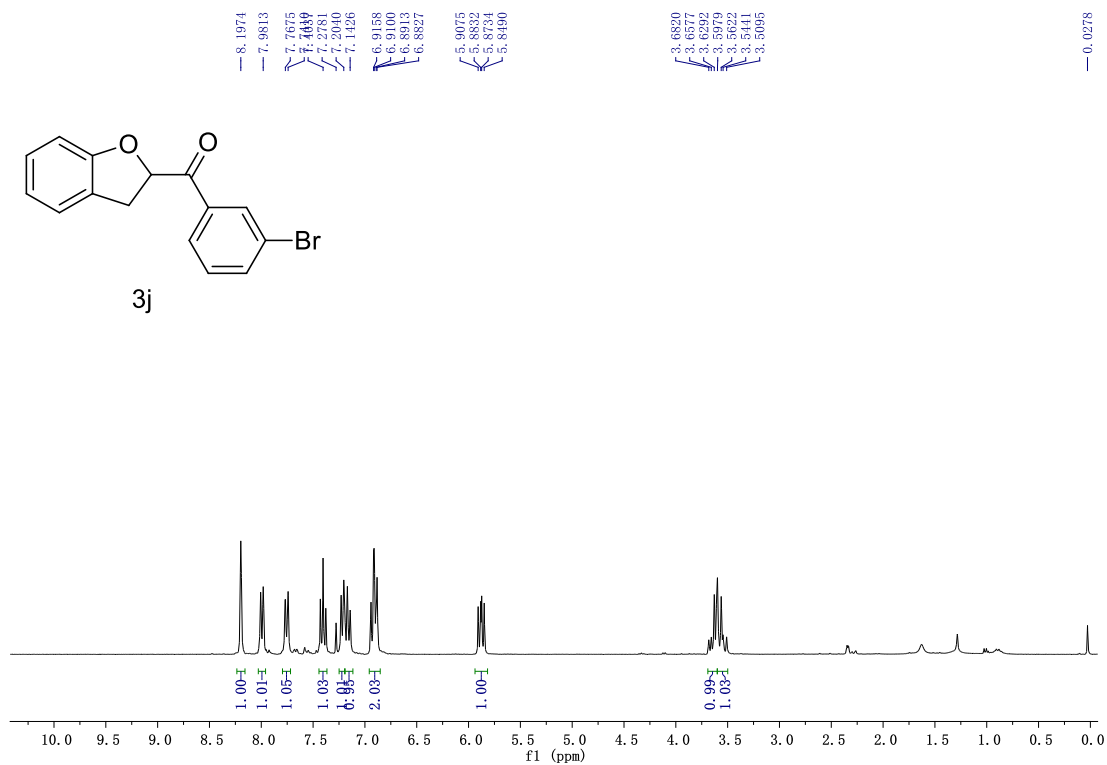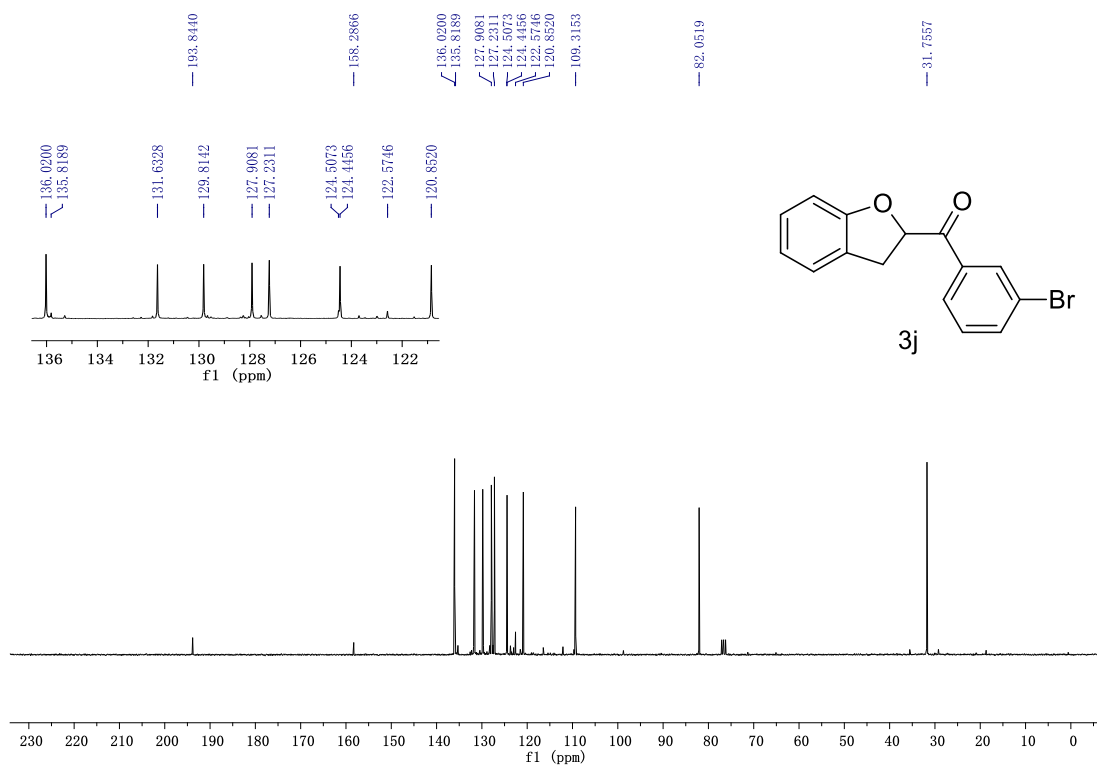

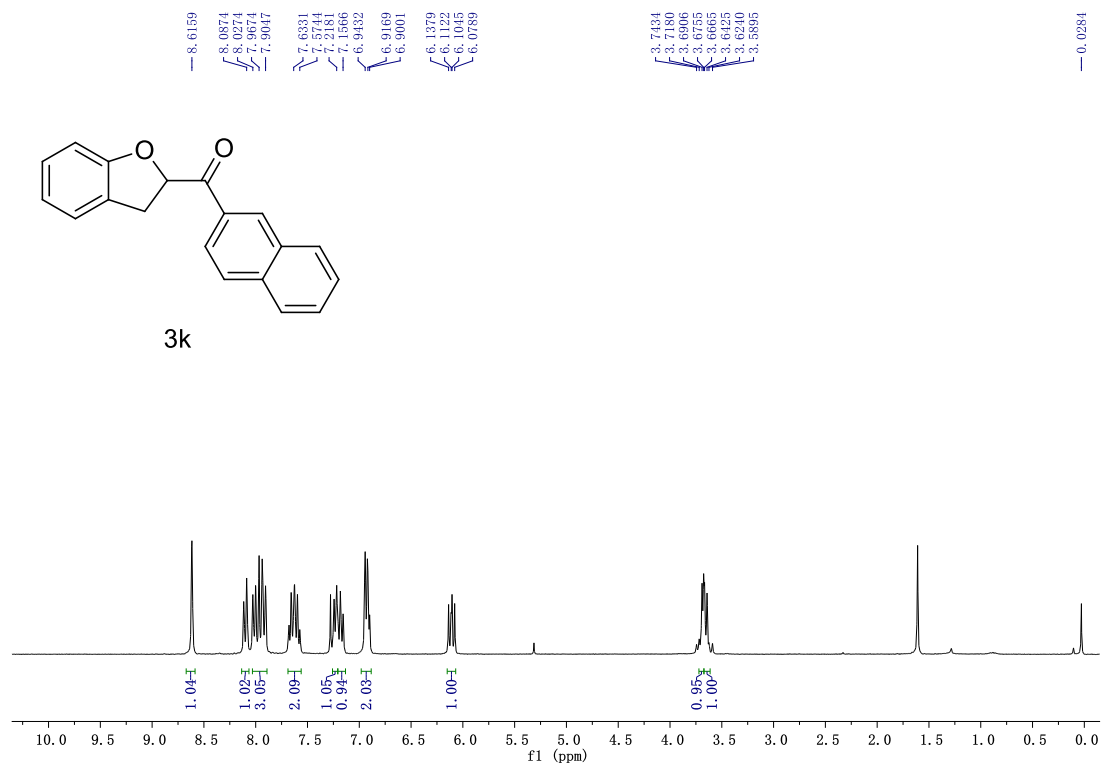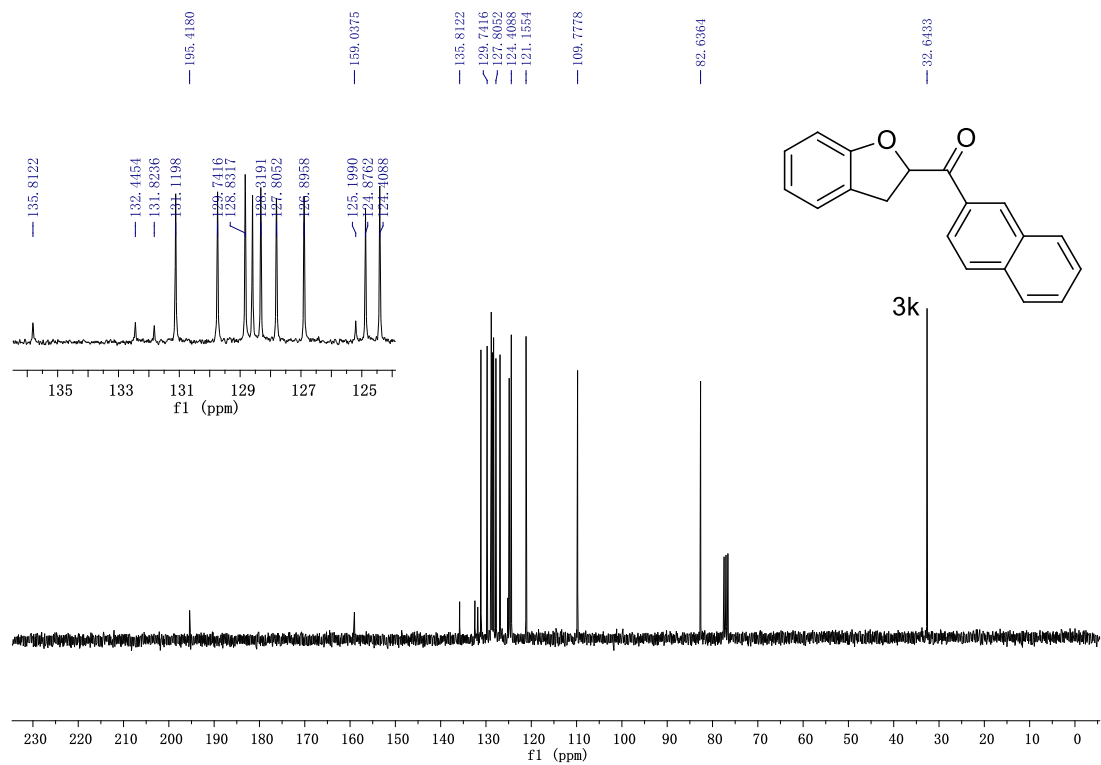

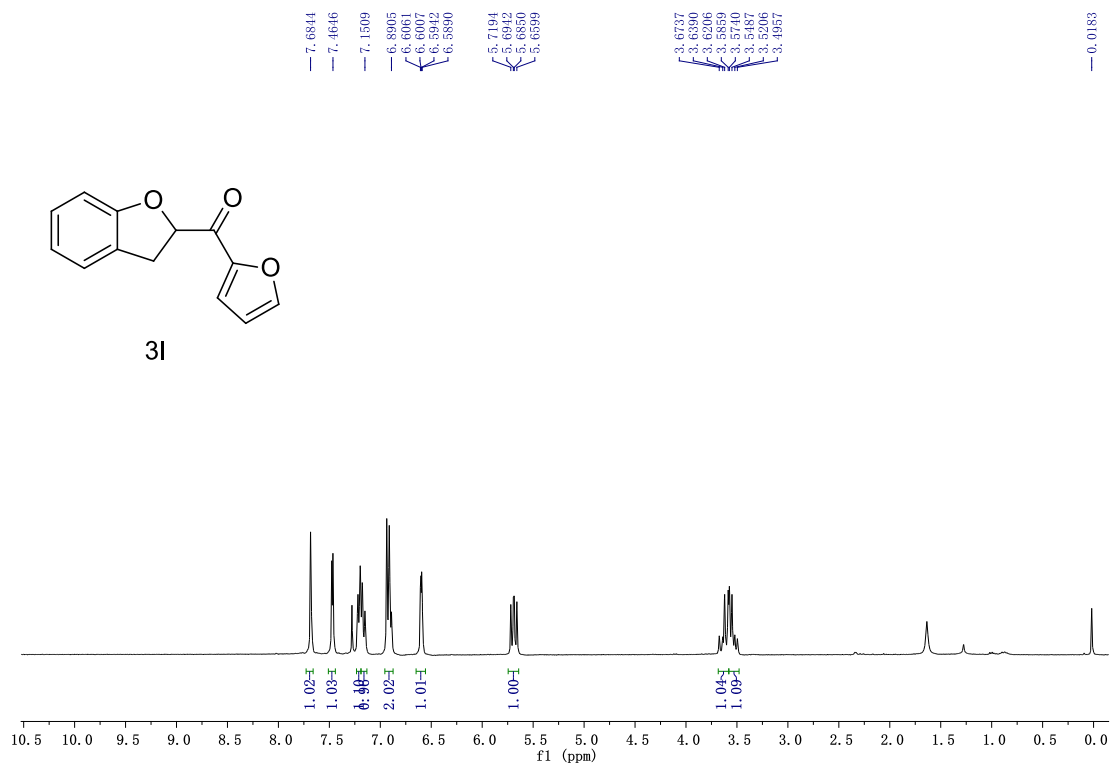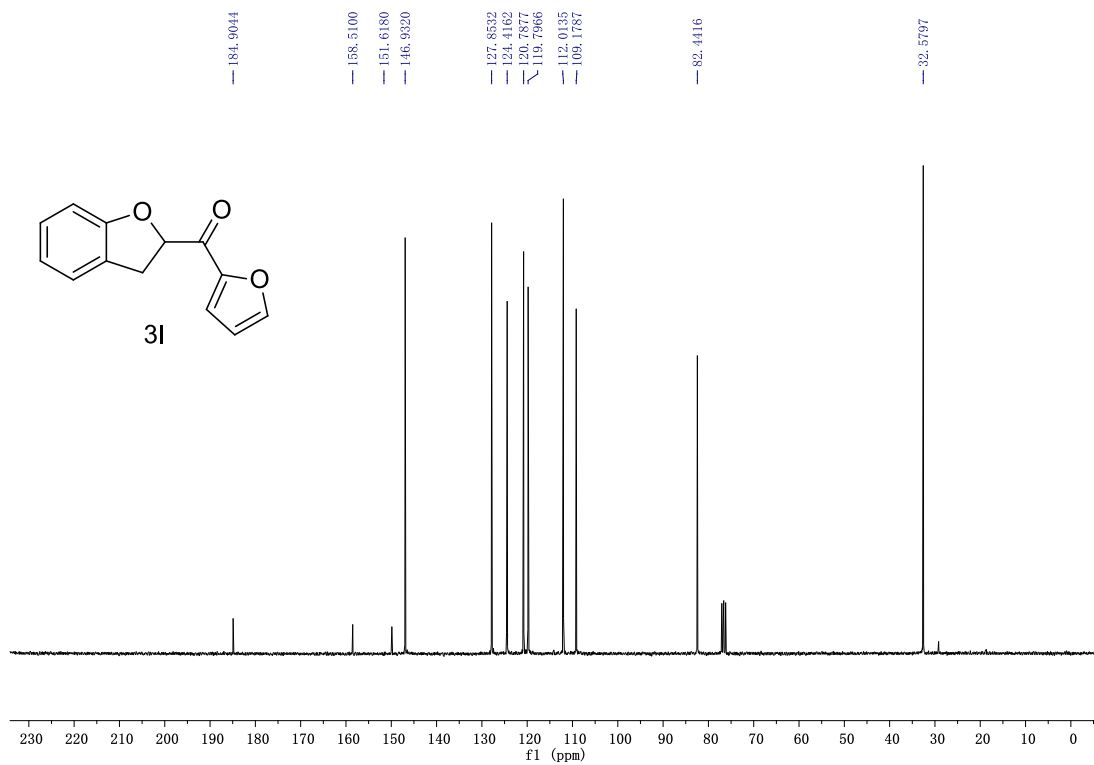

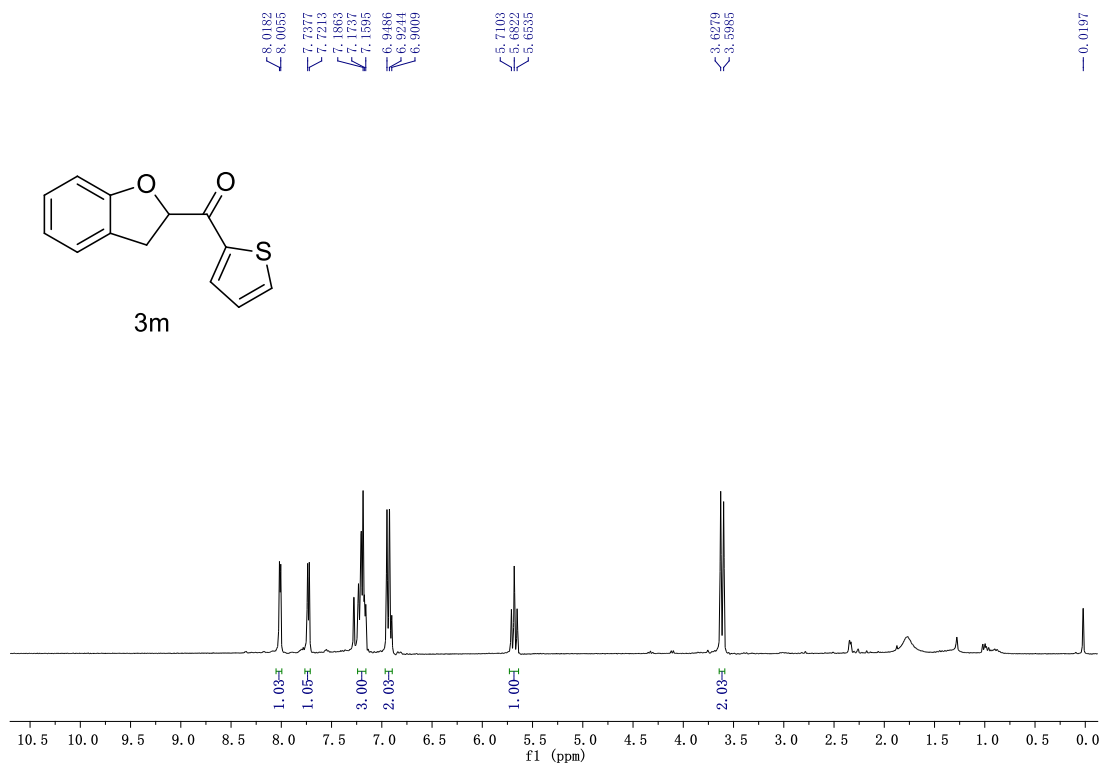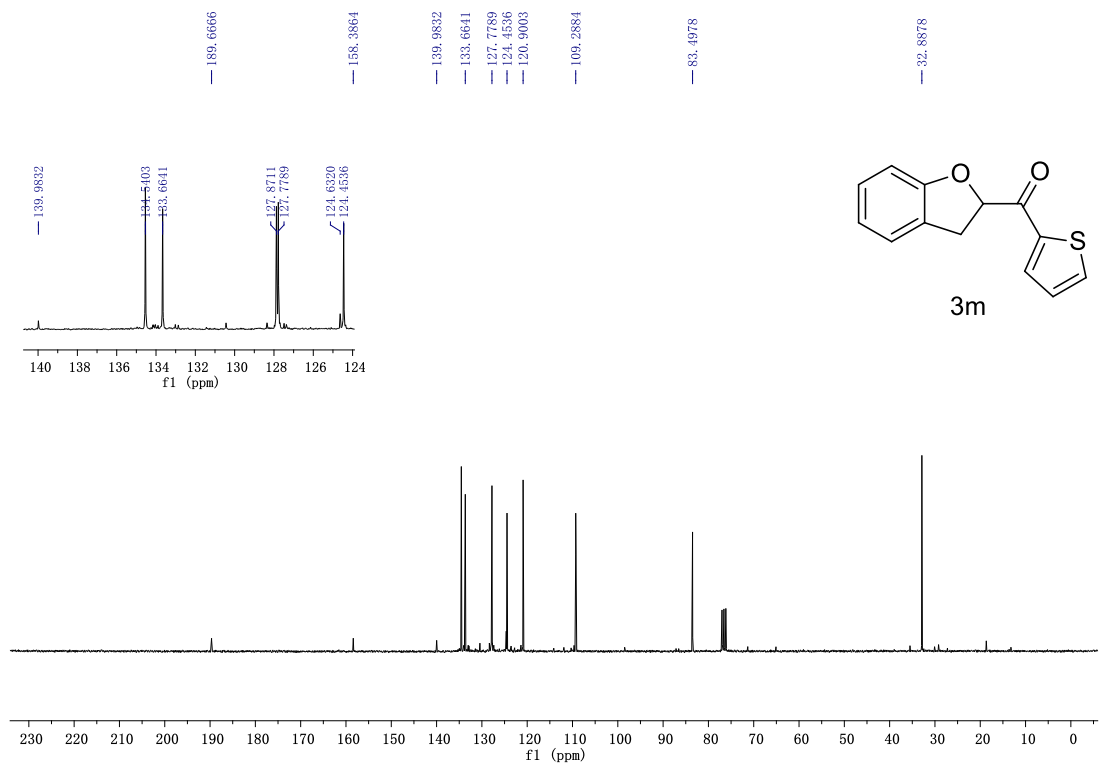

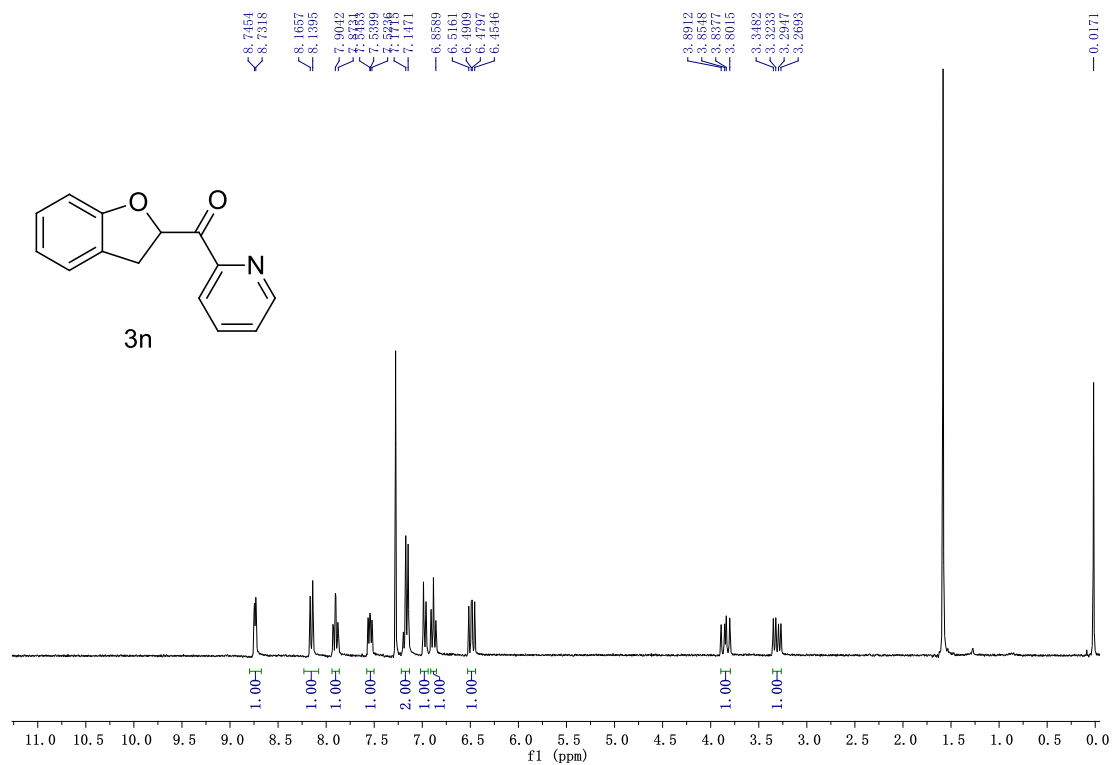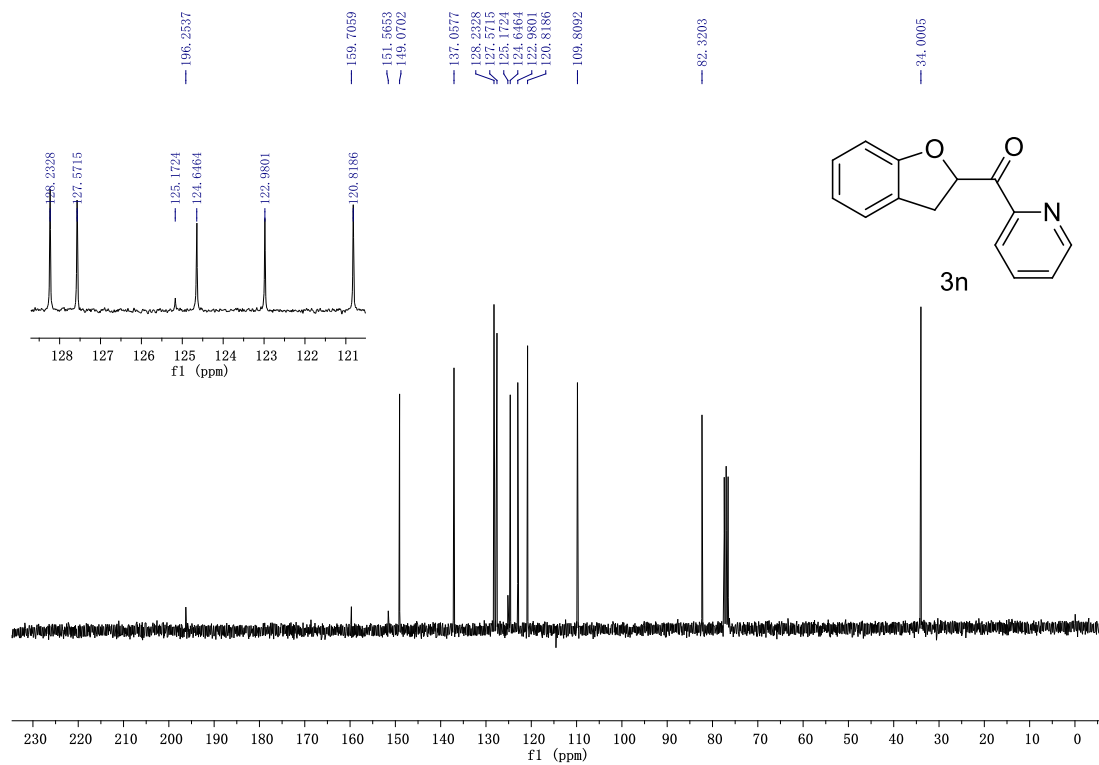

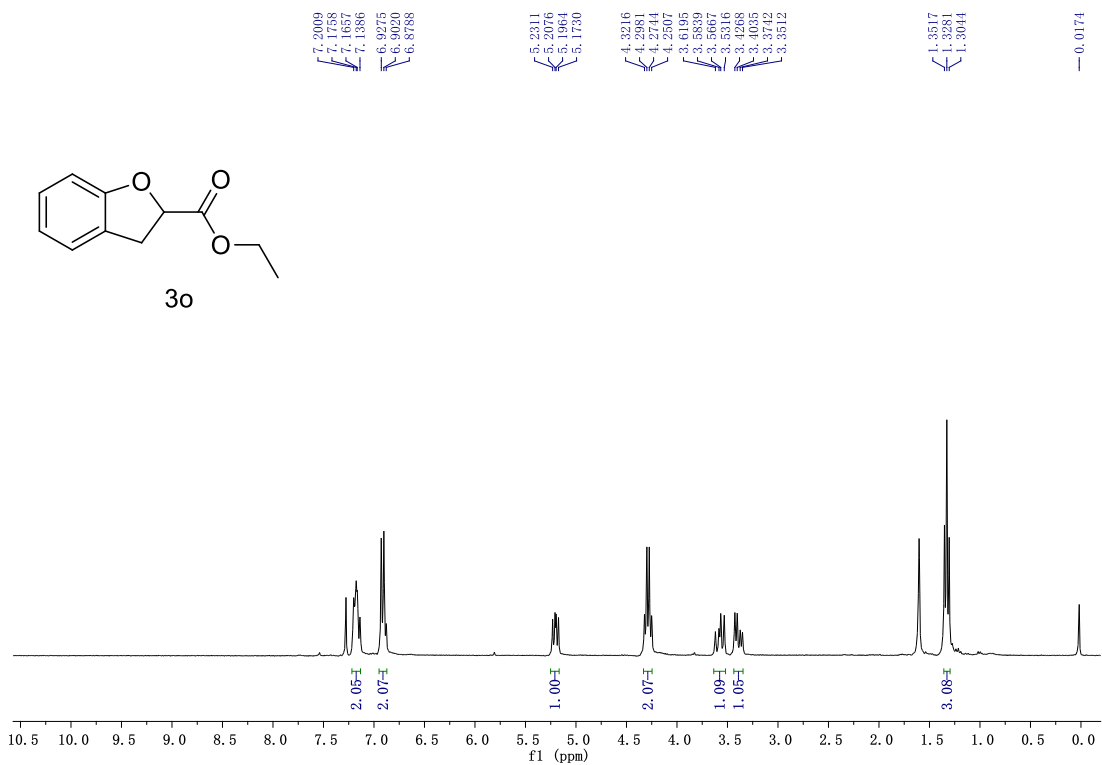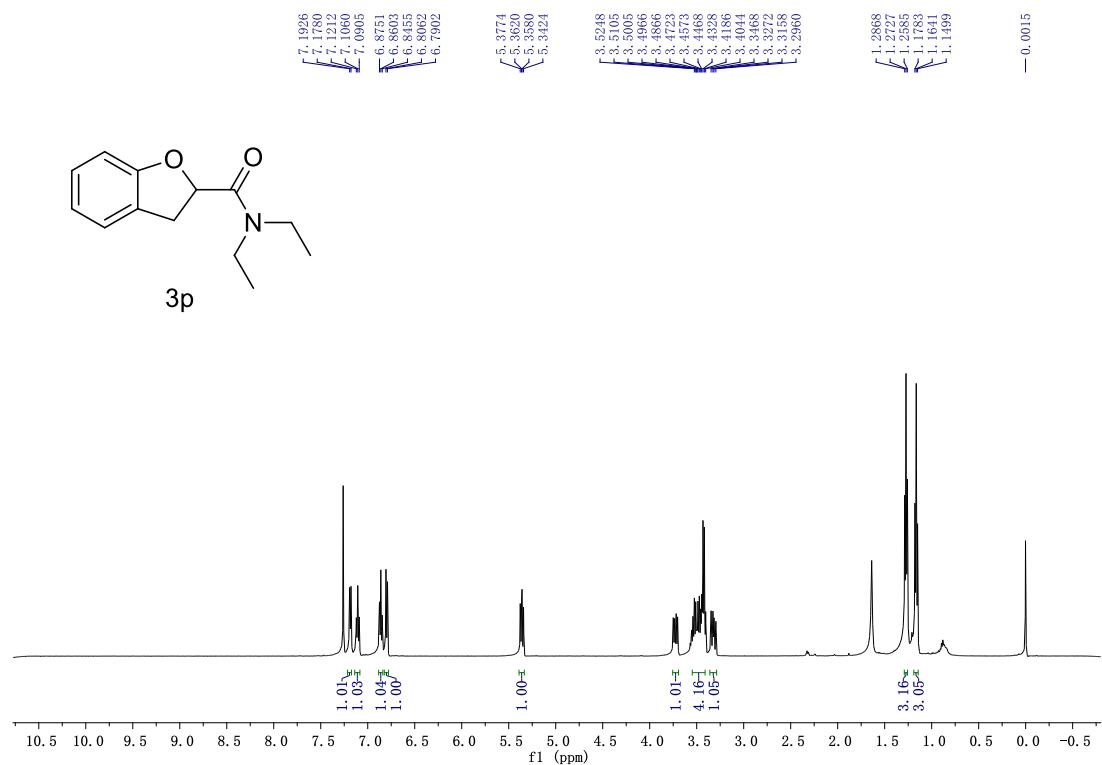

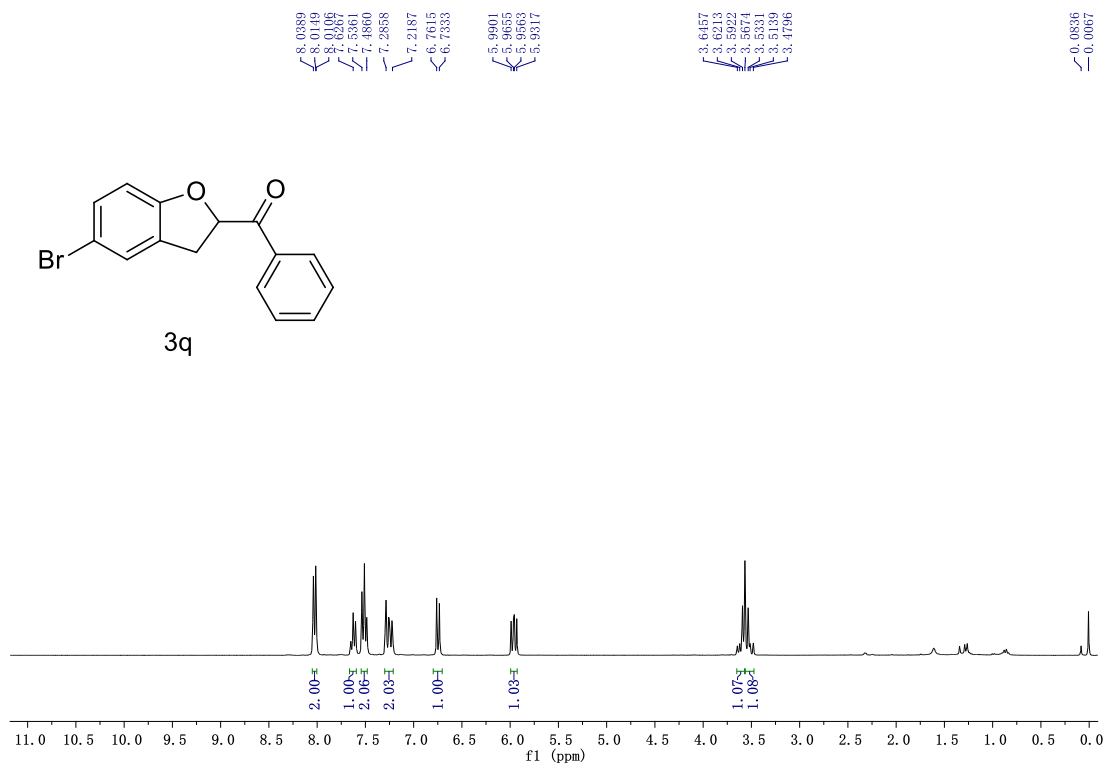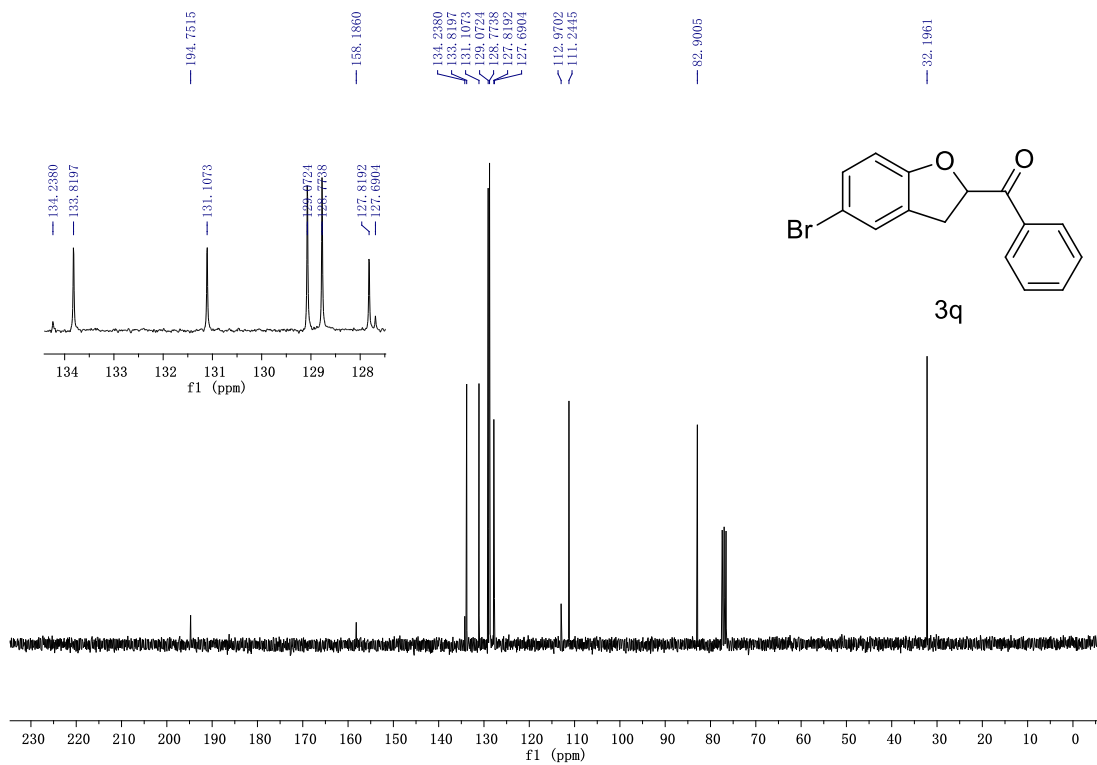

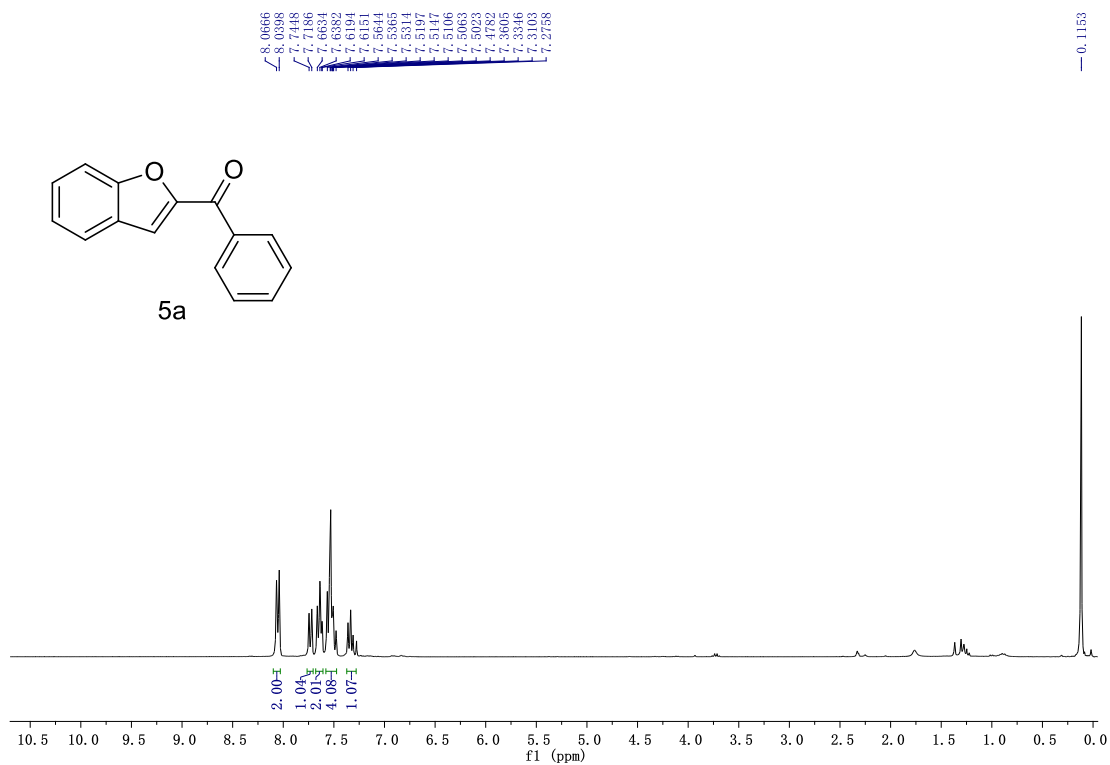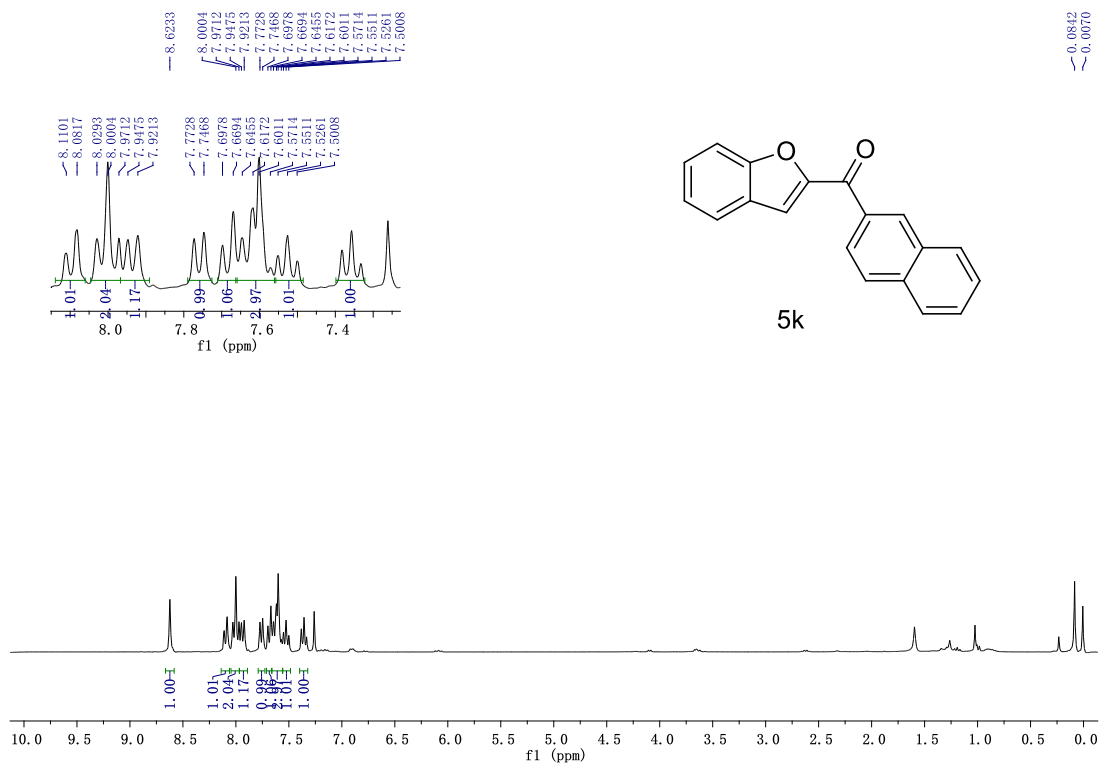



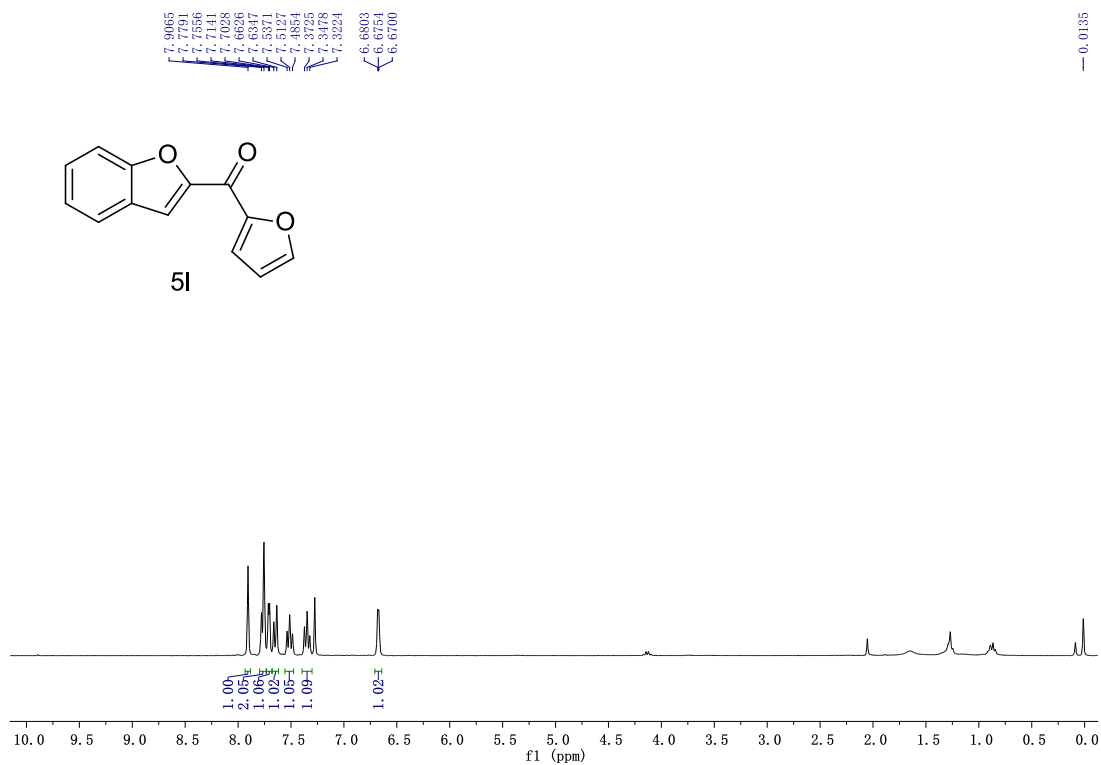

LXT-C-283 CDCl<sub>3</sub> <sup>1</sup>H NMR AV300

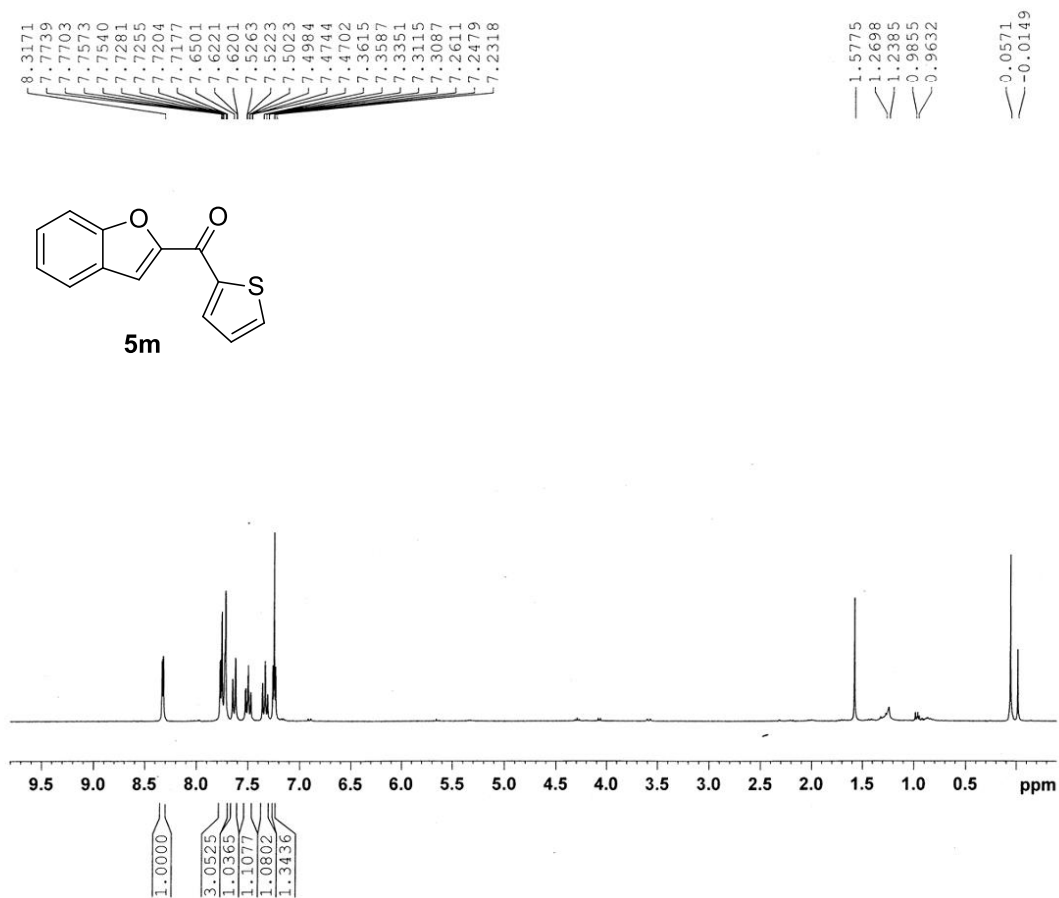

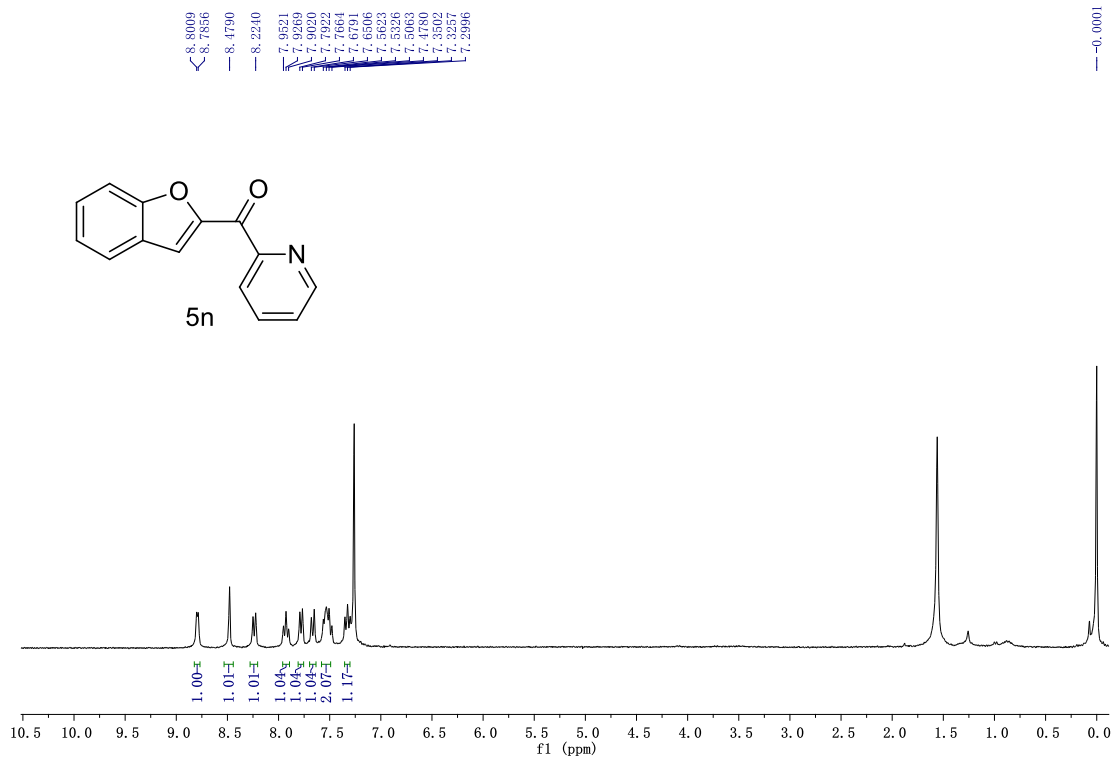

LXT-C-286 CDCL<sub>3</sub> <sup>1</sup>H NMR AV300

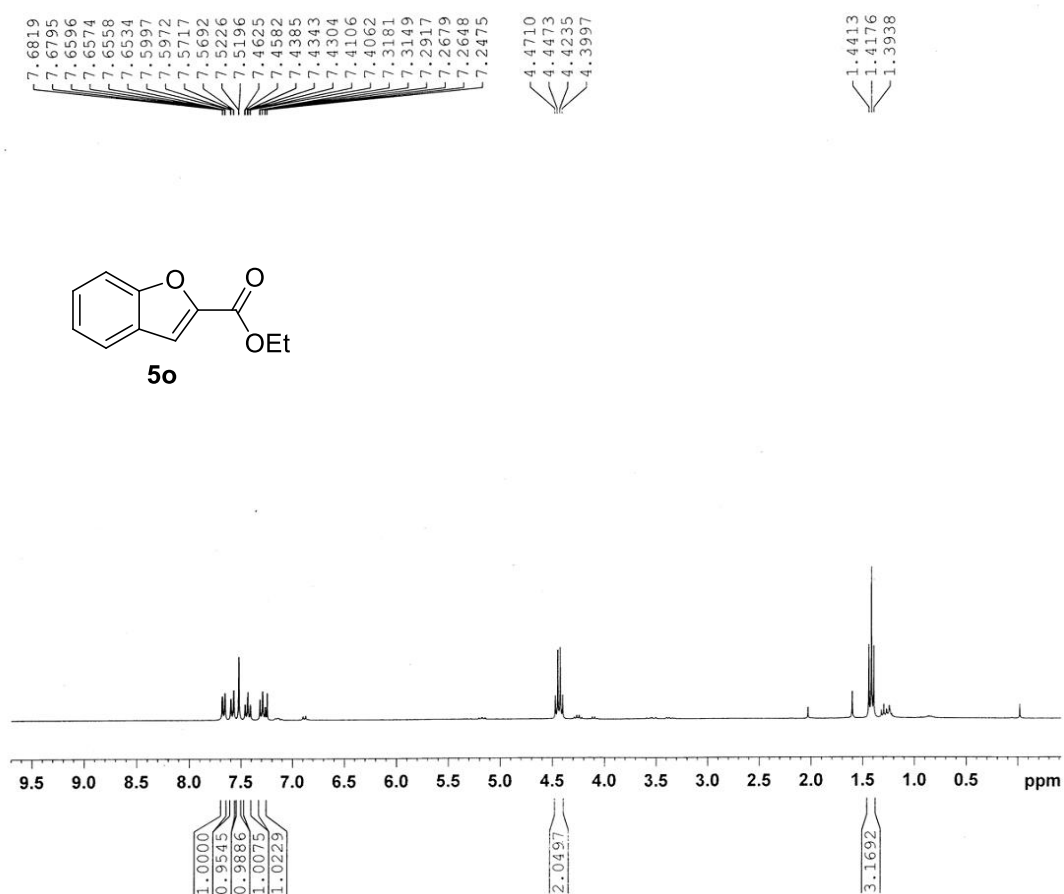

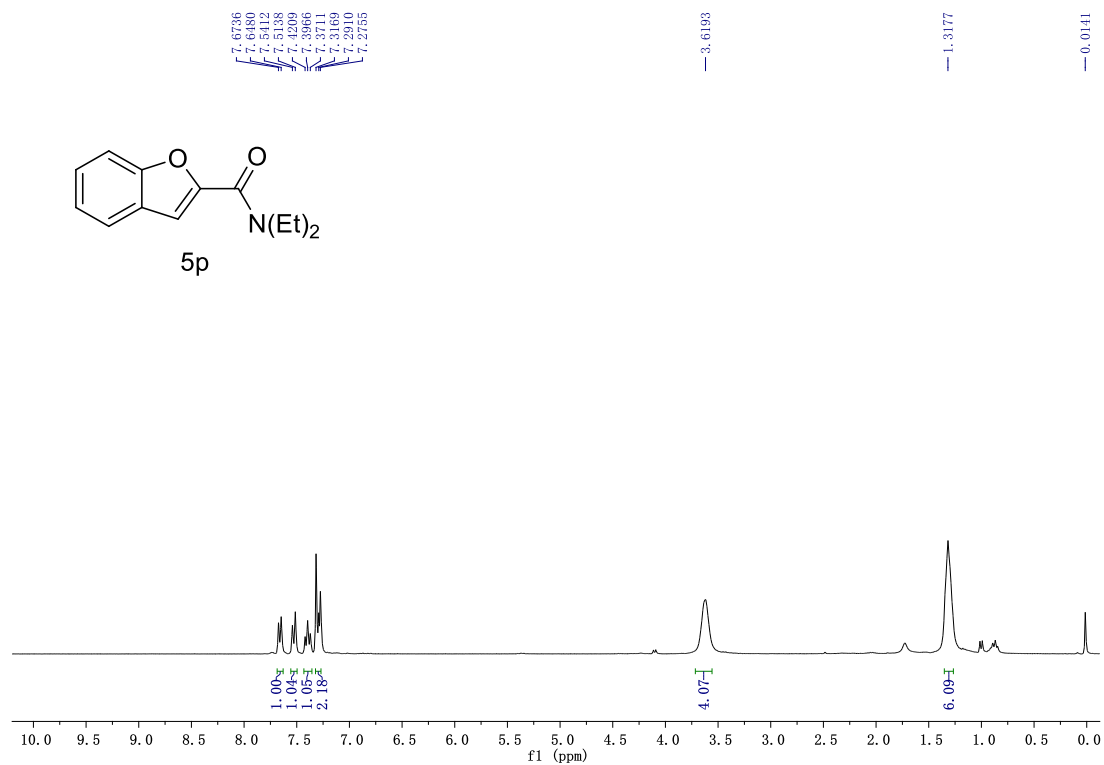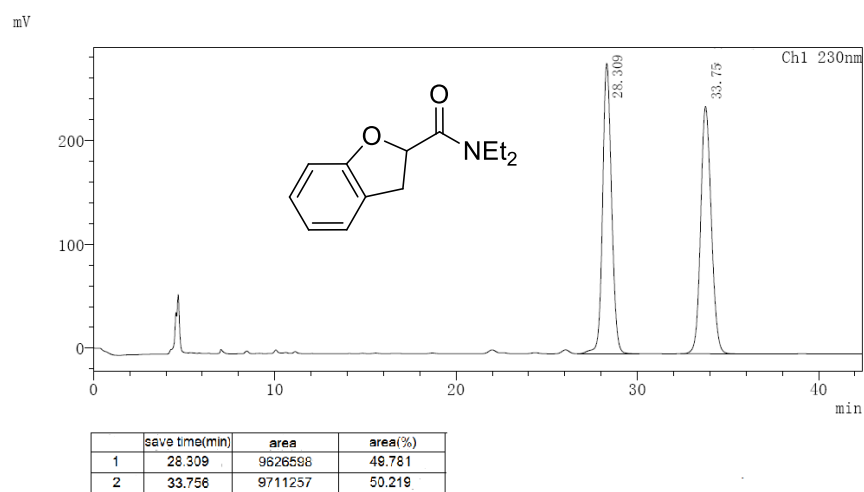

mV

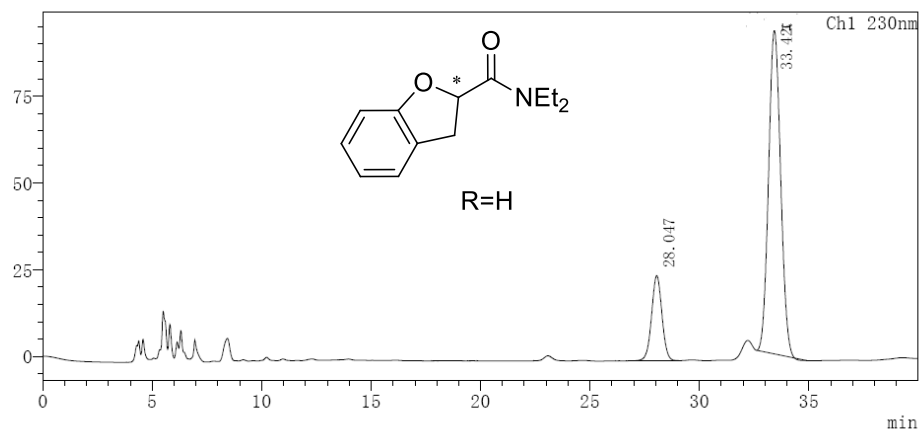

mV

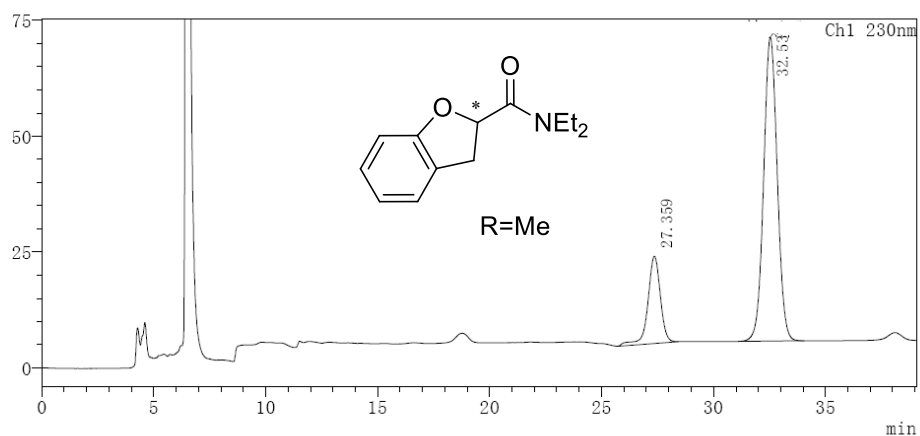

Supplement: c4ra17003b1.pdf [file c4ra17003b1.pdf]
